# Supplementary material for: BENFEP, a quantitative database of BENthic Foraminifera from surface sediments of the Eastern Pacific
Source: Copernicus journal article supplement (doi:10.5194/essd-2022-324), 2022-10-04
Supplement: Supplementary file 1 [file Supplement1.docx]

Supplement of

BENFEP, a quantitative database of BENthic Foraminifera from surface sediments of the Eastern Pacific

Paula Diz, Víctor Gónzalez-Guitián, Rita González-Villanueva, Aida Ovejero, Iván Hernández-Almeida

*Correspondence to*: Paula Diz (pauladiz@uvigo.es)

**Supplement**

Excel file indicating the systematics of benthic foraminiferal valid species names in BENFEP following the concepts of the World Foraminifera Database (Hayward et al., 2022, last accessed in March 2022).
