# Supplementary material for: BENFEP, a quantitative database of BENthic Foraminifera from surface sediments of the Eastern Pacific
Source: Copernicus journal article supplement (doi:10.5194/essd-2022-324), 2022-10-04
Supplement: Supplementary file 2 [file Supplement1.xlsx]

## Sheet: BENFEP_valid species names
Scientific name	Authority	url_WORMS	Other names given in the original sources
Adelosina dutemplei	(d'Orbigny, 1846)	https://www.marinespecies.org/aphia.php?p=taxdetails&id=577330	Quinqueloculina dutemplei
Adercotryma glomeratum	(Brady, 1878)	https://www.marinespecies.org/aphia.php?p=taxdetails&id=417607	Adercotryma glomerata, Adercotryma glomeratus
Alabaminella weddellensis	(Earland, 1936)	https://www.marinespecies.org/aphia.php?p=taxdetails&id=113350	Epistominella pusilla Parr, Eponides pusillus Parr, Eponides weddellensis
Alliatina primitiva	(Cushman & McCulloch, 1940)	https://www.marinespecies.org/aphia.php?p=taxdetails&id=736506	Cushmanella primitiva
Alterammina alternans	(Earland, 1934)	https://www.marinespecies.org/aphia.php?p=taxdetails&id=398217
Alveolophragmium orbiculatum	Shchedrina, 1936	https://www.marinespecies.org/aphia.php?p=taxdetails&id=412745
Ammobaculites agglutinans	(d'Orbigny, 1846)	https://www.marinespecies.org/aphia.php?p=taxdetails&id=114024
Ammobaculites cylindricus	Cushman, 1910	https://www.marinespecies.org/aphia.php?p=taxdetails&id=480184
Ammobaculites dilatatus	Cushman & Brönnimann, 1948	https://www.marinespecies.org/aphia.php?p=taxdetails&id=417587
Ammobaculites exiguus	Cushman & Brönnimann, 1948	https://www.marinespecies.org/aphia.php?p=taxdetails&id=417589
Ammobaculites filiformis	Earland, 1934	https://www.marinespecies.org/aphia.php?p=taxdetails&id=114026	Ammobaculites agglutinans filaformis Heron-Allen and Earland
Ammodiscus anguillae	Höglund, 1947	https://www.marinespecies.org/aphia.php?p=taxdetails&id=113815
Ammodiscus gullmarensis	Höglund, 1948	https://www.marinespecies.org/aphia.php?p=taxdetails&id=113818
Ammodiscus incertus	(d'Orbigny, 1839)	https://www.marinespecies.org/aphia.php?p=taxdetails&id=113819	Cornuspira incerta
Ammodiscus minutissimus	Cushman & McCulloch, 1939	https://www.marinespecies.org/aphia.php?p=taxdetails&id=522914
Ammodiscus tenuis	(Brady, 1881)	https://www.marinespecies.org/aphia.php?p=taxdetails&id=113826	Involutina tenuis
Ammoglobigerina globigeriniformis	(Parker & Jones, 1865)	https://www.marinespecies.org/aphia.php?p=taxdetails&id=114298	Trochammina globigeriniformis
Ammoglobigerina globulosa	(Cushman, 1920)	https://www.marinespecies.org/aphia.php?p=taxdetails&id=412756
Ammoglobigerina pygmaea	(Höglund, 1947)	https://www.marinespecies.org/aphia.php?p=taxdetails&id=849356
Ammolagena clavata	(Jones & Parker, 1860)	https://www.marinespecies.org/aphia.php?p=taxdetails&id=113827
Ammomarginulina catenulata	(Cushman & McCulloch, 1939)	https://www.marinespecies.org/aphia.php?p=taxdetails&id=816190	Ammobaculites catenulatus
Ammomarginulina ensis	Wiesner, 1931	https://www.marinespecies.org/aphia.php?p=taxdetails&id=398901
Ammomarginulina recurva Earland, 1934	Earland, 1934	https://www.marinespecies.org/aphia.php?p=taxdetails&id=398902	Ammomarginulina foliaceaus (Brady) var. recurva (Earland), Eratidus foliaceus recurvus (Earland, 1934)
Ammomarginulina sandiegoensis	Uchio, 1960	https://www.marinespecies.org/aphia.php?p=taxdetails&id=528479
Ammonia avalonensis	(Natland, 1950)	https://www.marinespecies.org/aphia.php?p=taxdetails&id=582710	Rotalia avalonensis
Ammonia beccarii	(Linnaeus, 1758)	https://www.marinespecies.org/aphia.php?p=taxdetails&id=112849
Ammonia decorata	Golik, 1977	https://www.marinespecies.org/aphia.php?p=taxdetails&id=900674
Ammonia sobrina	(Shupack, 1934)	https://www.marinespecies.org/aphia.php?p=taxdetails&id=595893	Streblus beccarii var. Sobrinus
Ammonia tepida	(Cushman, 1926)	https://www.marinespecies.org/aphia.php?p=taxdetails&id=112857
Ammoscalaria pseudospiralis	(Williamson, 1858)	https://www.marinespecies.org/aphia.php?p=taxdetails&id=113918
Ammoscalaria tenuimargo	(Brady, 1882)	https://www.marinespecies.org/aphia.php?p=taxdetails&id=113920	Ammoscalaria cf. tenuimargo
Ammotium morenoi	(Acosta, 1940)	https://www.marinespecies.org/aphia.php?p=taxdetails&id=736481
Amphicoryna scalaris	(Batsch, 1791)	https://www.marinespecies.org/aphia.php?p=taxdetails&id=113780	Lagenonodosaria scalaris
Amphicoryna separans	(Brady, 1884)	https://www.marinespecies.org/aphia.php?p=taxdetails&id=417827
Amphisorus hemprichii	Ehrenberg, 1839	https://www.marinespecies.org/aphia.php?p=taxdetails&id=112822
Anomalinella rostrata	(Brady, 1881)	https://www.marinespecies.org/aphia.php?p=taxdetails&id=484698
Anomalinoides globulosus	(Chapman & Parr, 1937)	https://www.marinespecies.org/aphia.php?p=taxdetails&id=417990	Anomalinoides globulosa, Anomalina globulosa
Anomalinoides minimus	Vismara Schilling & Parisi, 1981	https://www.marinespecies.org/aphia.php?p=taxdetails&id=1037680
Anomalinoides spissiformis	(Cushman & Stainforth, 1945)	https://www.marinespecies.org/foraminifera/aphia.php?p=taxdetails&id=1470603
Arbor multiplex	Schröder, Medioli & Scott, 1989	https://www.marinespecies.org/aphia.php?p=taxdetails&id=408298
Archimerismus subnodosus	(Brady, 1884)	https://www.marinespecies.org/aphia.php?p=taxdetails&id=417571	Hyperammina subnodosa
Arenoparrella mexicana	(Kornfeld, 1931)	https://www.marinespecies.org/aphia.php?p=taxdetails&id=417609
Arenoparrella oceanica	Uchio, 1960	https://www.marinespecies.org/aphia.php?p=taxdetails&id=528480
Arenoturrispirillina catinus	(Höglund, 1947)	https://www.marinespecies.org/aphia.php?p=taxdetails&id=817905
Articularia lineata	(Brady, 1884)	https://www.marinespecies.org/aphia.php?p=taxdetails&id=480174
Astacolus albatrossi	(Cushman, 1923)	https://www.marinespecies.org/aphia.php?p=taxdetails&id=417829
Astacolus crepidula	(Fichtel & Moll, 1798)	https://www.marinespecies.org/aphia.php?p=taxdetails&id=1484639
Astacolus hyalacrulus	Loeblich & Tappan, 1953	https://www.marinespecies.org/aphia.php?p=taxdetails&id=521014
Asterigerinata pacifica	Uchio, 1960	https://www.marinespecies.org/aphia.php?p=taxdetails&id=528481
Astrononion echolsi	Kennett, 1967	https://www.marinespecies.org/aphia.php?p=taxdetails&id=113549
Astrononion hamadaense	Asano, 1950	https://www.marinespecies.org/aphia.php?p=taxdetails&id=814775	Astrononion gallowayi Loeblich & Tappan, 1953
Astrononion incilis	Lankford, 1973	https://www.marinespecies.org/aphia.php?p=taxdetails&id=862722
Astrononion sidebottomi	Cushman & Edwards, 1937	https://www.marinespecies.org/aphia.php?p=taxdetails&id=113551
Astrononion stellatum	(Terquem, 1882)	https://www.marinespecies.org/aphia.php?p=taxdetails&id=954368
Astrononion umbilicatulum	Uchio, 1952	https://www.marinespecies.org/aphia.php?p=taxdetails&id=522124
Astrononion viragoense	Cushman & Edwards, 1937	https://www.marinespecies.org/aphia.php?p=taxdetails&id=924632
Astrorhiza arenaria	Carpenter in Norman, 1877	https://www.marinespecies.org/aphia.php?p=taxdetails&id=113840
Astrorhiza granulosa	(Brady, 1879)	https://www.marinespecies.org/aphia.php?p=taxdetails&id=113842	Amphitremoidea granulosa, Astrorhiza angulosa (Brady) in Burmistrova et al., 2007
Baculella globofera	Tendal & Hessler, 1977	https://www.marinespecies.org/aphia.php?p=taxdetails&id=182993
Baggina bradyi	(Brotzen, 1936)	https://www.marinespecies.org/aphia.php?p=taxdetails&id=418010	Valvulineria bradyi
Bathysiphon crassatinus	(Brady, 1881)	https://www.marinespecies.org/aphia.php?p=taxdetails&id=1436443
Bathysiphon eocenicus	Cushman & Hanna, 1927	https://www.marinespecies.org/aphia.php?p=taxdetails&id=1394328
Bathysiphon filiformis	Sars, 1872	https://www.marinespecies.org/aphia.php?p=taxdetails&id=113851
Bifarilaminella advena	(Cushman, 1923)	https://www.marinespecies.org/aphia.php?p=taxdetails&id=466188	Lagena advena
Bigenerina minutissima	Earland, 1933	https://www.marinespecies.org/aphia.php?p=taxdetails&id=736488
Biloculina elongata	Ehrenberg, 1843	https://www.marinespecies.org/aphia.php?p=taxdetails&id=902216	Pyrgo quadrata
Bolivina (Loxostomum) boltovskoyi	Smith, 1963	https://www.marinespecies.org/aphia.php?p=taxdetails&id=897019
Bolivina (Loxostomum) salvadorensis	Smith, 1963	https://www.marinespecies.org/aphia.php?p=taxdetails&id=918898
Bolivina advena	Cushman, 1925	https://www.marinespecies.org/aphia.php?p=taxdetails&id=814778
Bolivina advena subsp. acutula	Bandy, 1953	https://www.marinespecies.org/aphia.php?p=taxdetails&id=848919	Bolivina acutula, Brizalina acutula
Bolivina advena var. striatella	Cushman, 1925	https://www.marinespecies.org/aphia.php?p=taxdetails&id=927255	Bolivina striatella
Bolivina alata	(Seguenza, 1862)	https://www.marinespecies.org/aphia.php?p=taxdetails&id=112964	Brizalina alata
Bolivina argentea	Cushman, 1926	https://www.marinespecies.org/aphia.php?p=taxdetails&id=852154	Brizalina argentea, Bolivina argentea
Bolivina argentea var. resigae	Zalesny, 1959	https://www.marinespecies.org/aphia.php?p=taxdetails&id=927451	Bolivina argentea Cushman var. monicana Zalesny 1959
Bolivina bicostata	Cushman, 1926	https://www.marinespecies.org/aphia.php?p=taxdetails&id=862705	Bolivina bicostata Cushman, 1926, Bolivina costata d'Orbigny var. bicostata, Bolivina interjuncta bicostata, Bolivina interjuncta bicostata
Bolivina cincta	Heron-Allen & Earland, 1932	https://www.marinespecies.org/aphia.php?p=taxdetails&id=112969
Bolivina compacta	Sidebottom, 1905	https://www.marinespecies.org/aphia.php?p=taxdetails&id=112970
Bolivina costata	d'Orbigny, 1839	https://www.marinespecies.org/aphia.php?p=taxdetails&id=933026
Bolivina daggarius	Parker, 1955	https://www.marinespecies.org/aphia.php?p=taxdetails&id=417904	Bolivina lanceolata Parker, 1954, Bolivina daggaria Parker, 1955
Bolivina decussata	(Brady, 1881)	https://www.marinespecies.org/aphia.php?p=taxdetails&id=480219
Bolivina doniezi	Cushman & Wickenden, 1929	https://www.marinespecies.org/aphia.php?p=taxdetails&id=522974
Bolivina earlandi	Parr, 1950	https://www.marinespecies.org/aphia.php?p=taxdetails&id=183019
Bolivina humilis	Cushman & McCulloch, 1942	https://www.marinespecies.org/aphia.php?p=taxdetails&id=816071	Bolivina seminuda Cushman var. humilis, Brizalina humilis
Bolivina inflata	Heron-Allen & Earland, 1913	https://www.marinespecies.org/aphia.php?p=taxdetails&id=112974
Bolivina interjuncta	Cushman, 1926	https://www.marinespecies.org/aphia.php?p=taxdetails&id=926387	Bolivina costata d’Orbigny var. Interjuncta Cushman, 1926, Bolivina costata d´Orbigny var. Interjuncta Cushman, 1926 Bolivina interjuncta Galloway & Wissler, 1927, Bolivina interjuncta interjuncta Galloway and Wissler, 1927. Note that Galloway and Wiessner, 1927 do not describe a new species but they refer to Bolivina costata d´Orbigny var interjuncta Cushman, 1926.
Bolivina lowmani	Phleger & Parker, 1951	https://www.marinespecies.org/aphia.php?p=taxdetails&id=112976
Bolivina malovensis	Heron-Allen & Earland, 1932	https://www.marinespecies.org/aphia.php?p=taxdetails&id=523133
Bolivina marginata	Cushman, 1918	https://www.marinespecies.org/aphia.php?p=taxdetails&id=932877
Bolivina minima	Phleger & Parker, 1951	https://www.marinespecies.org/aphia.php?p=taxdetails&id=112977
Bolivina ordinaria	Phleger & Parker, 1952	https://www.marinespecies.org/aphia.php?p=taxdetails&id=112978	Bolivina simplex Phleger and Parker, 1951
Bolivina pacifica	Cushman & McCulloch, 1942	https://www.marinespecies.org/aphia.php?p=taxdetails&id=112979	Bolivina acerosa Cushman var pacifica, Bolivinita pacifica, Brizalina pacifica, Bolivinellina pacifica
Bolivina paula	Cushman & Cahill, 1932	https://www.marinespecies.org/aphia.php?p=taxdetails&id=417910
Bolivina perrini	Kleinpell, 1938	https://www.marinespecies.org/aphia.php?p=taxdetails&id=915046
Bolivina plicata	d'Orbigny, 1839	https://www.marinespecies.org/aphia.php?p=taxdetails&id=112981
Bolivina plicatella	Cushman, 1930	https://www.marinespecies.org/aphia.php?p=taxdetails&id=522744
Bolivina pseudoplicata	Kacharava, 1982	https://www.marinespecies.org/aphia.php?p=taxdetails&id=1316285
Bolivina pseudospissa	Kleinpell, 1938	https://www.marinespecies.org/aphia.php?p=taxdetails&id=916847
Bolivina punctata	d'Orbigny, 1839	https://www.marinespecies.org/aphia.php?p=taxdetails&id=112984
Bolivina pygmaea	(Brady, 1881)	https://www.marinespecies.org/aphia.php?p=taxdetails&id=112985
Bolivina quadrata	Cushman & McCulloch, 1942	https://www.marinespecies.org/aphia.php?p=taxdetails&id=417912
Bolivina rankini	Kleinpell, 1938	https://www.marinespecies.org/aphia.php?p=taxdetails&id=917575	Bolivina rankini Kleinpell, 1938
Bolivina robusta	(Brady, 1881)	https://www.marinespecies.org/aphia.php?p=taxdetails&id=466349
Bolivina semicostata	Cushman, 1911	https://www.marinespecies.org/aphia.php?p=taxdetails&id=710176
Bolivina seminuda	Cushman, 1911	https://www.marinespecies.org/aphia.php?p=taxdetails&id=1027892
Bolivina semiperforata	Martin, 1952	https://www.marinespecies.org/aphia.php?p=taxdetails&id=919502
Bolivina silvestrina	Cushman, 1936	https://www.marinespecies.org/aphia.php?p=taxdetails&id=735328	Bolivina cf. Silvestriana, Bolivina silvestrina
Bolivina sinuata	Galloway & Wissler, 1927	https://www.marinespecies.org/aphia.php?p=taxdetails&id=920122
Bolivina spissa	Cushman, 1926	https://www.marinespecies.org/aphia.php?p=taxdetails&id=814781	Brizalina spissa
Bolivina striatula	Cushman, 1922	https://www.marinespecies.org/aphia.php?p=taxdetails&id=112989
Bolivina subadvena	Cushman, 1926	https://www.marinespecies.org/aphia.php?p=taxdetails&id=525519
Bolivina subadvena subsp. acuminata	Natland, 1946	https://www.marinespecies.org/aphia.php?p=taxdetails&id=862700	Bolivina acuminata, Brizalina acuminata, Bolivina subadvena Cushman var. serrata Natland, 1938
Bolivina subadvena var. sulphurensis	Cushman & Adams, 1935	https://www.marinespecies.org/foraminifera/aphia.php?p=taxdetails&id=931175
Bolivina subaenariensis	Cushman, 1922	https://www.marinespecies.org/aphia.php?p=taxdetails&id=112990
Bolivina subaenariensis var. mexicana	Cushman, 1922	https://www.marinespecies.org/aphia.php?p=taxdetails&id=112990
Bolivina subargentea	Uchio, 1960	https://www.marinespecies.org/aphia.php?p=taxdetails&id=522129
Bolivina subspinescens	Cushman, 1922	https://www.marinespecies.org/aphia.php?p=taxdetails&id=112992	Laterostomella subspinescens
Bolivina tongi	Cushman, 1929	https://www.marinespecies.org/aphia.php?p=taxdetails&id=112996
Bolivina tongi var. filacostata	Cushman & McCulloch, 1942	https://www.marinespecies.org/aphia.php?p=taxdetails&id=525986	Bolivina filacostata
Bolivina tumida	Cushman, 1925	https://www.marinespecies.org/aphia.php?p=taxdetails&id=923605
Bolivina variabilis	(Williamson, 1858)	https://www.marinespecies.org/aphia.php?p=taxdetails&id=112998	Bolivina subexcavata Cushman & Wickenden, 1929
Bolivina vaughani	Natland, 1938	https://www.marinespecies.org/aphia.php?p=taxdetails&id=521604	Brizalina vaughani
Bolivinellina pseudopunctata	(Höglund, 1947)	https://www.marinespecies.org/aphia.php?p=taxdetails&id=112999
Bolivinellina translucens	(Phleger & Parker, 1951)	https://www.marinespecies.org/aphia.php?p=taxdetails&id=526512	Bolivina translucens
Bolivinita minuta	(Natland, 1938)	https://www.marinespecies.org/aphia.php?p=taxdetails&id=1551292	Bolivina minima Bolivina minuta; Bolivina minuta; Loxostomum minuta
Bolivinita quadrilatera	(Schwager, 1866)	https://www.marinespecies.org/aphia.php?p=taxdetails&id=417917
Botellina labyrinthica	Brady, 1881	https://www.marinespecies.org/aphia.php?p=taxdetails&id=113864
Botuloides ittai	(Loeblich & Tappan, 1953)	https://www.marinespecies.org/aphia.php?p=taxdetails&id=1436963	Dentalina ittai
Buccella angulata	Uchio, 1960	https://www.marinespecies.org/aphia.php?p=taxdetails&id=522130
Buccella frigida	(Cushman, 1922)	https://www.marinespecies.org/aphia.php?p=taxdetails&id=113136
Buccella hannai	(Phleger & Parker, 1951)	https://www.marinespecies.org/aphia.php?p=taxdetails&id=418009
Buccella inusitata	Andersen, 1952	https://www.marinespecies.org/aphia.php?p=taxdetails&id=528103
Buccella parkerae	Andersen, 1952	https://www.marinespecies.org/aphia.php?p=taxdetails&id=914406
Buccella peruviana	(d'Orbigny, 1839)	https://www.marinespecies.org/aphia.php?p=taxdetails&id=736489
Buccella tenerrima	(Bandy, 1950)	https://www.marinespecies.org/aphia.php?p=taxdetails&id=113139
Bulimina aculeata	d'Orbigny, 1826	https://www.marinespecies.org/aphia.php?p=taxdetails&id=113030
Bulimina buchiana	d'Orbigny, 1846	https://www.marinespecies.org/aphia.php?p=taxdetails&id=113033
Bulimina clava	Cushman & Parker, 1947	https://www.marinespecies.org/aphia.php?p=taxdetails&id=528191
Bulimina denudata	Cushman & Parker, 1938	https://www.marinespecies.org/aphia.php?p=taxdetails&id=816068
Bulimina elongata	d'Orbigny, 1846	https://www.marinespecies.org/aphia.php?p=taxdetails&id=933974
Bulimina fossa	Cushman & Parker, 1938	https://www.marinespecies.org/aphia.php?p=taxdetails&id=522947
Bulimina gibba	Fornasini, 1902	https://www.marinespecies.org/aphia.php?p=taxdetails&id=113040
Bulimina inflata	Seguenza, 1862	https://www.marinespecies.org/aphia.php?p=taxdetails&id=113041
Bulimina marginata	d'Orbigny, 1826	https://www.marinespecies.org/aphia.php?p=taxdetails&id=113042
Bulimina marginospinata	Cushman & Parker, 1938	https://www.marinespecies.org/aphia.php?p=taxdetails&id=522948
Bulimina pagoda	Cushman, 1927	https://www.marinespecies.org/aphia.php?p=taxdetails&id=522687
Bulimina pagoda var. hebespinata	Stewart & Stewart, 1930	https://www.marinespecies.org/foraminifera/aphia.php?p=taxdetails&id=930125
Bulimina patagonica	d'Orbigny, 1839	https://www.marinespecies.org/aphia.php?p=taxdetails&id=525526
Bulimina patagonica var. glabra	Cushman & Wickenden, 1929	https://marinespecies.org/foraminifera/aphia.php?p=taxdetails&id=525999
Bulimina pulchella	d'Orbigny, 1839	https://www.marinespecies.org/aphia.php?p=taxdetails&id=933658
Bulimina simplex	Terquem emend. Cushman & Parker, 1937	https://www.marinespecies.org/aphia.php?p=taxdetails&id=992458
Bulimina spicata	Phleger & Parker, 1951	https://www.marinespecies.org/aphia.php?p=taxdetails&id=417924
Bulimina spinifera	Cushman, 1927	https://www.marinespecies.org/aphia.php?p=taxdetails&id=522688
Bulimina striata	d'Orbigny in Guérin-Méneville, 1832	https://www.marinespecies.org/aphia.php?p=taxdetails&id=113047	Bulimina costata d´Orbigny, 1852; Bulimina striata d´Orbigny var. mexicana Cushman, Bulimina striata d´Orbigny
Bulimina subacuminata	Cushman & Stewart, 1930	https://www.marinespecies.org/aphia.php?p=taxdetails&id=921144
Bulimina subulata	Cushman & Parker, 1937	https://www.marinespecies.org/aphia.php?p=taxdetails&id=113050	Bulimina elongata d'Orbigny var. subulata Cushman and Parker, 1937
Bulimina torta	Cushman, 1911	https://www.marinespecies.org/aphia.php?p=taxdetails&id=710178	Francesita torta
Bulimina translucens	Parker, 1953	https://www.marinespecies.org/aphia.php?p=taxdetails&id=737759
Bulimina truncana	Gümbel, 1870	https://www.marinespecies.org/aphia.php?p=taxdetails&id=466352	Bulimina rostrata Brady, 1884; Bulimina truncana Gümbel, 1868; Bulimina alazanensis Cushman, 1927
Buliminella bassendorfensis	Cushman & Parker, 1937	https://www.marinespecies.org/aphia.php?p=taxdetails&id=896474
Buliminella curta	Cushman, 1925	https://www.marinespecies.org/aphia.php?p=taxdetails&id=900158
Buliminella dubia	Barbat & Johnson, 1934	https://www.marinespecies.org/aphia.php?p=taxdetails&id=901667
Buliminella elegantissima	(d'Orbigny, 1839)	https://www.marinespecies.org/aphia.php?p=taxdetails&id=113747
Buliminella elegantissima var. limbosa	Cushman & McCulloch, 1948	https://www.marinespecies.org/aphia.php?p=taxdetails&id=525988
Buliminella elegantissima var. tenuis	Cushman & McCulloch, 1948	https://www.marinespecies.org/aphia.php?p=taxdetails&id=525987
Burseolina pacifica	(Cushman, 1925)	https://www.marinespecies.org/aphia.php?p=taxdetails&id=723129	Cassidulina pacifica
Buzasina galeata	(Brady, 1881)	https://www.marinespecies.org/aphia.php?p=taxdetails&id=465976	Cystammina galeata
Buzasina ringens	(Brady, 1879)	https://www.marinespecies.org/aphia.php?p=taxdetails&id=417574	Alveolophragmium ringens, Cribostomoides ringens
Cancris auricula	(Fichtel & Moll, 1798)	https://www.marinespecies.org/aphia.php?p=taxdetails&id=582554	Cancris auricularis; Cancris inflatus (d´Orbigny)
Cancris carmenensis	Natland, 1950	https://www.marinespecies.org/aphia.php?p=taxdetails&id=521629
Cancris communis	Cushman & Todd, 1942	https://www.marinespecies.org/aphia.php?p=taxdetails&id=1550778
Cancris panamensis	Natland, 1938	https://www.marinespecies.org/aphia.php?p=taxdetails&id=521605
Cancris sagra	(d'Orbigny, 1839)	https://www.marinespecies.org/aphia.php?p=taxdetails&id=418011	Discorbis panamensis
Cassidelina spinescens	(Cushman, 1911)	https://www.marinespecies.org/aphia.php?p=taxdetails&id=490037	Bolivina spinescens
Cassidulina auka	Boltovskoy & Theyer, 1970	https://www.marinespecies.org/aphia.php?p=taxdetails&id=1324195
Cassidulina braziliensis	Cushman, 1922	https://www.marinespecies.org/aphia.php?p=taxdetails&id=710179	Cassidulinoides braziliensis (Cushman)
Cassidulina caribeana	Redmond, 1953	https://www.marinespecies.org/aphia.php?p=taxdetails&id=897825
Cassidulina carinata	Silvestri, 1896	https://www.marinespecies.org/aphia.php?p=taxdetails&id=183041	Cassidulina laevigata carinata Silvestri, 1896
Cassidulina corbyi	Cushman & Hughes, 1925	https://www.marinespecies.org/aphia.php?p=taxdetails&id=899324
Cassidulina laevigata	d'Orbigny, 1826	https://www.marinespecies.org/aphia.php?p=taxdetails&id=113077
Cassidulina limbata	Cushman & Hughes, 1925	https://www.marinespecies.org/aphia.php?p=taxdetails&id=764015	Islandiella limbata
Cassidulina lomitensis	Galloway & Wissler, 1927	https://www.marinespecies.org/aphia.php?p=taxdetails&id=764018
Cassidulina pulchella	d'Orbigny, 1839	https://www.marinespecies.org/aphia.php?p=taxdetails&id=764025
Cassidulina quadrata	Cushman & Hughes, 1925	https://www.marinespecies.org/aphia.php?p=taxdetails&id=764026	Cassidulina subglobosa Brady var quadrata
Cassidulina reniforme	Nørvang, 1945	https://www.marinespecies.org/aphia.php?p=taxdetails&id=113083	Cassidulina bradshawi Uchio, 1960
Cassidulina subcarinata	Uchio, 1960	https://www.marinespecies.org/aphia.php?p=taxdetails&id=522132
Cassidulina teretis	Tappan, 1951	https://www.marinespecies.org/aphia.php?p=taxdetails&id=113085
Cassidulina tortuosa	Cushman & Hughes, 1925	https://www.marinespecies.org/aphia.php?p=taxdetails&id=764031
Cassidulina translucens	Cushman & Hughes, 1925	https://www.marinespecies.org/aphia.php?p=taxdetails&id=764032
Cassidulina tumida	Natland, 1938	https://www.marinespecies.org/aphia.php?p=taxdetails&id=521607
Cassidulinoides akitaensis	Nomura, 1999	https://www.marinespecies.org/aphia.php?p=taxdetails&id=1311734
Cassidulinoides bifrons	Drooger, 1953	https://www.marinespecies.org/aphia.php?p=taxdetails&id=896811
Cassidulinoides howei	Cushman, 1946	https://www.marinespecies.org/aphia.php?p=taxdetails&id=906121
Cassidulinoides mexicana	(Cushman, 1922)	https://www.marinespecies.org/aphia.php?p=taxdetails&id=417955
Cassidulinoides parkeriana	(Brady, 1881)	https://www.marinespecies.org/aphia.php?p=taxdetails&id=413877
Cassidulinoides porrecta	(Heron-Allen & Earland, 1932)	https://www.marinespecies.org/aphia.php?p=taxdetails&id=850325
Cassidulinoides simplex	Cushman & Todd, 1945	https://www.marinespecies.org/aphia.php?p=taxdetails&id=919962
Cassidulinoides waltoni	Uchio, 1960	https://www.marinespecies.org/aphia.php?p=taxdetails&id=522133
Ceratobulimina jonesiana	(Brady, 1881)	https://www.marinespecies.org/aphia.php?p=taxdetails&id=113106	Ceratobulimina pacifica
Cerebrina clathrata	(Brady, 1884)	https://www.marinespecies.org/aphia.php?p=taxdetails&id=508100
Chilostomella cushmani	Chapman, 1941	https://www.marinespecies.org/aphia.php?p=taxdetails&id=523288
Chilostomella czizeki	Reuss, 1850	https://www.marinespecies.org/aphia.php?p=taxdetails&id=735509
Chilostomella grandis	Cushman, 1917	https://www.marinespecies.org/aphia.php?p=taxdetails&id=710180
Chilostomella mediterranensis	Cushman & Todd, 1949	https://www.marinespecies.org/aphia.php?p=taxdetails&id=910692
Chilostomella oolina	Schwager, 1878	https://www.marinespecies.org/aphia.php?p=taxdetails&id=113553
Chilostomella ovoidea	Reuss, 1850	https://www.marinespecies.org/aphia.php?p=taxdetails&id=113554
Chilostomellina fimbriata	Cushman, 1926	https://www.marinespecies.org/aphia.php?p=taxdetails&id=761931
Chrysalidinella dimorpha	(Brady, 1881)	https://www.marinespecies.org/aphia.php?p=taxdetails&id=417931
Chrysalidinella spectabilis	Cushman & McCulloch, 1948	https://www.marinespecies.org/aphia.php?p=taxdetails&id=522935
Cibicides aknerianus	(d'Orbigny, 1846)	https://www.marinespecies.org/aphia.php?p=taxdetails&id=585188
Cibicides conoideus	Galloway & Wissler, 1927	https://www.marinespecies.org/aphia.php?p=taxdetails&id=899098
Cibicides cuvillieri	Rouvillois, 1960	https://www.marinespecies.org/aphia.php?p=taxdetails&id=900296
Cibicides fletcheri	Galloway & Wissler, 1927	https://www.marinespecies.org/aphia.php?p=taxdetails&id=112871	Cibicidoides fletcheri, Lobatula fletcheri
Cibicides floridanus	(Cushman, 1918)	https://www.marinespecies.org/aphia.php?p=taxdetails&id=418060	Cibicidoides floridanus
Cibicides gallowayi	Cushman & Valentine, 1930	https://www.marinespecies.org/aphia.php?p=taxdetails&id=522963
Cibicides pachyderma	(Rzehak, 1886)	https://www.marinespecies.org/aphia.php?p=taxdetails&id=723134
Cibicides phlegeri	Uchio, 1960	https://www.marinespecies.org/aphia.php?p=taxdetails&id=522134	Cibicidoides phlegeri
Cibicides refulgens	Montfort, 1808	https://www.marinespecies.org/aphia.php?p=taxdetails&id=112877
Cibicides spiralis	Natland, 1938	https://www.marinespecies.org/aphia.php?p=taxdetails&id=521608
Cibicidoides cicatricosus	(Schwager, 1866)	https://www.marinespecies.org/aphia.php?p=taxdetails&id=112880
Cibicidoides dispars	(d'Orbigny, 1839)	https://www.marinespecies.org/aphia.php?p=taxdetails&id=988305
Cibicidoides mckannai	(Galloway & Wissler, 1927)	https://www.marinespecies.org/aphia.php?p=taxdetails&id=1311388	Lobatula mckannai,Cibicidoides mckannai
Cibicidoides mundulus	(Brady, Parker & Jones, 1888)	https://www.marinespecies.org/aphia.php?p=taxdetails&id=418067	Cibicides kullenbergi Parker, 1953, Cibicidoides mundula
Cibicidoides pseudoungerianus	(Cushman, 1922)	https://www.marinespecies.org/aphia.php?p=taxdetails&id=112886
Cibicidoides pygmeus	(Hantken, 1875)	https://www.marinespecies.org/aphia.php?p=taxdetails&id=1466357	Eponides pygmeus
Cibicidoides robertsonianus	(Brady, 1881)	https://www.marinespecies.org/aphia.php?p=taxdetails&id=112887
Cibicidoides subhaidingerii	(Parr, 1950)	https://www.marinespecies.org/aphia.php?p=taxdetails&id=466487
Cibicidoides umbonatus	(Phleger & Parker, 1951)	https://www.marinespecies.org/aphia.php?p=taxdetails&id=418068
Cibicidoides variabilis	(d'Orbigny, 1826)	https://www.marinespecies.org/aphia.php?p=taxdetails&id=988322	Cibicides variabilis, Cibicidinella variabilis, Cibicidella variabilis
Cibicidoides wuellerstorfi	(Schwager, 1866)	https://www.marinespecies.org/aphia.php?p=taxdetails&id=112890	Cibicides wuellerstorfi, Fontbotia wuellestrofi, Planulina wuellersdorfi
Cibicorbis herricki	Hadley, 1934	https://www.marinespecies.org/aphia.php?p=taxdetails&id=723135	Valvulineria herricki
Conglophragmium coronatum	(Brady, 1879)	https://www.marinespecies.org/aphia.php?p=taxdetails&id=113943
Cornuspira crassisepta	Brady, 1882	https://www.marinespecies.org/aphia.php?p=taxdetails&id=484808
Cornuspira foliacea	(Philippi, 1844)	https://www.marinespecies.org/aphia.php?p=taxdetails&id=112487	Cornuspiroides foliacea, Cornuspiroides foliaceus
Cornuspira involvens	(Reuss, 1850)	https://www.marinespecies.org/aphia.php?p=taxdetails&id=112488	Cyclogyra involvens
Cornuspira lajollaensis	Uchio, 1960	https://www.marinespecies.org/aphia.php?p=taxdetails&id=522135
Cornuspira planorbis	Schultze, 1854	https://www.marinespecies.org/aphia.php?p=taxdetails&id=112489
Coryphostoma incrassatum	(Reuss, 1851)	https://www.marinespecies.org/aphia.php?p=taxdetails&id=1471466	Bolivina incrassata
Cribroelphidium batiale	(Saidova, 1961)	https://www.marinespecies.org/aphia.php?p=taxdetails&id=1484593
Cribroelphidium excavatum	(Terquem, 1875)	https://www.marinespecies.org/aphia.php?p=taxdetails&id=254680	Elphidium excavatum
Cribroelphidium gunteri	(Cole, 1931)	https://www.marinespecies.org/aphia.php?p=taxdetails&id=1026170	Cellanthus gunteri, Elphidium gunteri
Cribroelphidium incertum	(Williamson, 1858)	https://www.marinespecies.org/aphia.php?p=taxdetails&id=113240	Elphidium incertum
Cribroelphidium magellanicum	(Heron-Allen & Earland, 1932)	https://www.marinespecies.org/aphia.php?p=taxdetails&id=113242	Elphidium magellanicum
Cribroelphidium oregonense	(Cushman & Grant, 1927)	https://www.marinespecies.org/aphia.php?p=taxdetails&id=815309
Cribroelphidium poeyanum	(d'Orbigny, 1839)	https://www.marinespecies.org/aphia.php?p=taxdetails&id=113244
Cribroelphidium selseyense	(Heron-Allen & Earland, 1911)	https://www.marinespecies.org/foraminifera/aphia.php?p=taxdetails&id=754247	Elphidium excavatum var. selseyensis
Cribrogoesella pacifica	Cushman & Mcculloch, 1939	https://www.marinespecies.org/aphia.php?p=taxdetails&id=913947
Cribromiliolinella subvalvularis	(Parr, 1950)	https://www.marinespecies.org/aphia.php?p=taxdetails&id=466041	Miliolinella subvalvularis
Cribrorotalia meridionalis	(Cushman & Kellett, 1929)	https://www.marinespecies.org/aphia.php?p=taxdetails&id=1512916
Cribrostomoides evolutus	(Natland, 1938)	https://www.marinespecies.org/aphia.php?p=taxdetails&id=1545596	Haplophragmoides evolutus
Cribrostomoides jeffreysii	(Williamson, 1858)	https://www.marinespecies.org/aphia.php?p=taxdetails&id=114035	Labrospira jeffreysii, Veleroninoides jeffreysii
Cribrostomoides kosterensis	(Höglund, 1947)	https://www.marinespecies.org/aphia.php?p=taxdetails&id=114036	Labrospira kosterensis
Cribrostomoides nitidus	(Goës, 1896)	https://www.marinespecies.org/aphia.php?p=taxdetails&id=114037	Alveolopbragmium nitidum, Haphlophragmoides nitida, Cribrostomoides nitida
Cribrostomoides soldanii	(Earland, 1936)	https://www.marinespecies.org/aphia.php?p=taxdetails&id=849653
Cribrostomoides sphaerilocula	(Cushman, 1910)	https://www.marinespecies.org/aphia.php?p=taxdetails&id=736527	Haplophragmoides sphaeriloculus,
Cribrostomoides subglobosus	(Cushman, 1910)	https://www.marinespecies.org/aphia.php?p=taxdetails&id=254681	Alveolophragmium subglobosum (Cushman, 1920), Alveolopbragmium subglobosum (Sars), Recurvoides subglobosus (Sars), Cribrostomoides bradyi
Cribrostomoides subturbinatus	(Cushman, 1920)	https://www.marinespecies.org/aphia.php?p=taxdetails&id=1545597	Trochammina subturbinata
Cribrostomoides wiesneri	(Parr, 1950)	https://www.marinespecies.org/aphia.php?p=taxdetails&id=114044	Alveolophragmium wiesneri, Cribrostomoides wiesneri, Veleroninoides wiesneri
Crithionina hispida	Flint, 1899	https://www.marinespecies.org/aphia.php?p=taxdetails&id=114157
Cuneata arctica	(Brady, 1881)	https://www.marinespecies.org/aphia.php?p=taxdetails&id=113975	Reophax arcticus
Cushmanina desmophora	(Jones, 1874)	https://www.marinespecies.org/aphia.php?p=taxdetails&id=466189	Oolina desmophora
Cushmanina feildeniana	(Brady, 1878)	https://www.marinespecies.org/aphia.php?p=taxdetails&id=417863	Lagena feildeniana
Cushmanina plumigera	(Brady, 1881)	https://www.marinespecies.org/aphia.php?p=taxdetails&id=710357	Lagena plumigera
Cushmanina striatopunctata	(Parker & Jones, 1865)	https://www.marinespecies.org/aphia.php?p=taxdetails&id=417865	Lagena striata (d´Orbigny) var. striatopunctata Sidebottom, 1912, Lagena striatopunctata; Oolina striato-punctata
Cyclammina cancellata	Brady, 1879	https://www.marinespecies.org/aphia.php?p=taxdetails&id=114045
Cyclammina orbicularis	Brady, 1881	https://www.marinespecies.org/aphia.php?p=taxdetails&id=114046
Cyclammina pusilla	Brady, 1881	https://www.marinespecies.org/aphia.php?p=taxdetails&id=114047
Cyclammina subtrullissata	(Parr, 1950)	https://www.marinespecies.org/aphia.php?p=taxdetails&id=723151
Cyclammina trullissata	(Brady, 1879)	https://www.marinespecies.org/aphia.php?p=taxdetails&id=114049	Alveolophragmium trullisatum
Cymbaloporetta atlantica	(Cushman, 1934)	https://www.marinespecies.org/aphia.php?p=taxdetails&id=418070	Tretomphalus atlanticus
Cymbaloporetta bradyi	(Cushman, 1915)	https://www.marinespecies.org/aphia.php?p=taxdetails&id=466493
Cymbaloporetta squammosa	(d'Orbigny, 1839)	https://www.marinespecies.org/aphia.php?p=taxdetails&id=113134
Cystammina pauciloculata	(Brady, 1879)	https://www.marinespecies.org/aphia.php?p=taxdetails&id=183109
Dentalina decepta	(Bagg, 1912)	https://www.marinespecies.org/aphia.php?p=taxdetails&id=723156
Deuterammina (Deuterammina) grahami	Brönnimann & Whittaker, 1988	https://www.marinespecies.org/aphia.php?p=taxdetails&id=114301
Deuterammina (Deuterammina) montagui	Brönnimann & Whittaker, 1988	https://www.marinespecies.org/aphia.php?p=taxdetails&id=1046832
Deuterammina discorbis	(Earland, 1934)	https://www.marinespecies.org/aphia.php?p=taxdetails&id=114300	Trochammina discorbis
Deuterammina glabra	(Heron-Allen & Earland, 1932)	https://www.marinespecies.org/aphia.php?p=taxdetails&id=757089	Trochammina glabra
Deuterammina grisea	(Earland, 1934)	https://www.marinespecies.org/aphia.php?p=taxdetails&id=114302	Trochammina grisea
Deuterammina rotaliformis	(Heron-Allen & Earland, 1911)	https://www.marinespecies.org/aphia.php?p=taxdetails&id=114303	Trochammina rotaliformis, Trochammina rotaliniformis Wright, 1911
Discanomalina vermiculata	(d'Orbigny, 1839)	https://www.marinespecies.org/aphia.php?p=taxdetails&id=112893	Cyclocibicides vermiculatus
Discorbinella bertheloti	(d'Orbigny, 1839)	https://www.marinespecies.org/aphia.php?p=taxdetails&id=113143	Discorbis bertheloti; Hanzawaia bertheloti
Discorbis charlottensis	Cushman, 1925	https://www.marinespecies.org/aphia.php?p=taxdetails&id=898205	Angulodiscorbis charlottensis
Discorbis monicana	Zalesny, 1959	https://www.marinespecies.org/aphia.php?p=taxdetails&id=911627
Discorbis parkeri	Natland, 1950	https://www.marinespecies.org/aphia.php?p=taxdetails&id=521630	Neoconorbina parkerae
Discorbis peruvianus	(d'Orbigny, 1839)	https://www.marinespecies.org/aphia.php?p=taxdetails&id=736535
Discorbis planulinaformis	Keyzer, 1953	https://www.marinespecies.org/aphia.php?p=taxdetails&id=915520	Discorbinella planulinaformis
Discorbis vilardeboanus	(d'Orbigny, 1839)	https://www.marinespecies.org/aphia.php?p=taxdetails&id=113154	Rosalina vilardeboana
Dorothia bradyana	Cushman, 1936	https://www.marinespecies.org/aphia.php?p=taxdetails&id=114365
Dorothia goesii	(Cushman, 1911)	https://www.marinespecies.org/aphia.php?p=taxdetails&id=480188	Textularia goesi
Dyocibicides biserialis	Cushman & Valentine, 1930	https://www.marinespecies.org/aphia.php?p=taxdetails&id=466490
Dyocibicides perforata	Cushman & Valentine, 1930	https://www.marinespecies.org/aphia.php?p=taxdetails&id=522964
Earlandammina bullata	(Höglund, 1947)	https://www.marinespecies.org/aphia.php?p=taxdetails&id=741088	Tritaxis bullata, Trochammina bullata
Edgertonia floccula	Shires, Gooday & Jones, 1994	https://www.marinespecies.org/aphia.php?p=taxdetails&id=557082
Eggerella bradyi	(Cushman, 1911)	https://www.marinespecies.org/aphia.php?p=taxdetails&id=113930
Eggerella minuta	(Wiesner, 1931)	https://www.marinespecies.org/aphia.php?p=taxdetails&id=1044988	Verneuilina minuta
Eggerella pusilla	(Goës, 1896)	https://www.marinespecies.org/aphia.php?p=taxdetails&id=723162
Eggerella subadvena	Saidova, 1961	https://www.marinespecies.org/aphia.php?p=taxdetails&id=1530386
Eggerelloides advenus	(Cushman, 1922)	https://www.marinespecies.org/aphia.php?p=taxdetails&id=113934	Verneuilinulla advena, Eggerella advena
Eggerelloides scaber	(Williamson, 1858)	https://www.marinespecies.org/aphia.php?p=taxdetails&id=113938	Eggerella scabra
Ehrenbergina bradyi	Cushman, 1922	https://www.marinespecies.org/aphia.php?p=taxdetails&id=113088
Ehrenbergina compressa	Cushman, 1927	https://www.marinespecies.org/aphia.php?p=taxdetails&id=522692
Ehrenbergina healyi	Finlay, 1947	https://www.marinespecies.org/aphia.php?p=taxdetails&id=933569
Ehrenbergina ovalis	Saidova, 1961	https://www.marinespecies.org/aphia.php?p=taxdetails&id=1530412
Ehrenbergina pacifica	Cushman, 1927	https://www.marinespecies.org/aphia.php?p=taxdetails&id=479149
Ehrenbergina pupa	(d'Orbigny, 1839)	https://www.marinespecies.org/aphia.php?p=taxdetails&id=417957
Ehrenbergina serrata	Reuss, 1850	https://www.marinespecies.org/aphia.php?p=taxdetails&id=479152	Eherenbergina serrata pacifica
Ehrenbergina trigona	Goës, 1896	https://www.marinespecies.org/aphia.php?p=taxdetails&id=113089
Ehrenbergina undulata	Parker, 1953	https://www.marinespecies.org/aphia.php?p=taxdetails&id=737763
Eilohedra vitrea	(Parker, 1953)	https://www.marinespecies.org/aphia.php?p=taxdetails&id=466420	Eilohedra levicula (Resig), Epistominella vitrea, Eponides leviculus (Resig), Eponides leviculus (Resig)
Elongobula basicostata	(Parr, 1950)	https://www.marinespecies.org/aphia.php?p=taxdetails&id=1550408	Buliminella basicostata
Elphidiella groenlandica	(Cushman, 1933)	https://www.marinespecies.org/aphia.php?p=taxdetails&id=113251
Elphidiella hannai	(Cushman & Grant, 1927)	https://www.marinespecies.org/aphia.php?p=taxdetails&id=829301	Eponides hannai
Elphidiella nitida	Cushman, 1941	https://www.marinespecies.org/aphia.php?p=taxdetails&id=113252
Elphidium articulatum	(d'Orbigny, 1839)	https://www.marinespecies.org/aphia.php?p=taxdetails&id=113257
Elphidium bartletti	Cushman, 1933	https://www.marinespecies.org/aphia.php?p=taxdetails&id=113259
Elphidium crispum	(Linnaeus, 1758)	https://www.marinespecies.org/aphia.php?p=taxdetails&id=113262
Elphidium discoidale	(d'Orbigny, 1839)	https://www.marinespecies.org/aphia.php?p=taxdetails&id=418086	Cellanthus discoidale
Elphidium excavatum subsp clavatum	Cushman, 1930	https://www.marinespecies.org/aphia.php?p=taxdetails&id=466569	Cribroelphidium cf. C. clavatum, Elphidium clavatum
Elphidium fax	Nicol, 1944	https://www.marinespecies.org/aphia.php?p=taxdetails&id=815332
Elphidium frigidum	Cushman, 1933	https://www.marinespecies.org/aphia.php?p=taxdetails&id=522854	Cribrononion frigidum, Cribrononion frigidus, Elphidium frigidum
Elphidium hughesi	Cushman & Grant, 1927	https://www.marinespecies.org/aphia.php?p=taxdetails&id=815334
Elphidium lene	Cushman & McCulloch, 1940	https://www.marinespecies.org/aphia.php?p=taxdetails&id=478595
Elphidium macellum	(Fichtel & Moll, 1798)	https://www.marinespecies.org/aphia.php?p=taxdetails&id=113276
Elphidium microgranulosum	Galloway & Wissler, 1951	https://www.marinespecies.org/aphia.php?p=taxdetails&id=910964	Cribroelphidium microgranulosum
Elphidium rugulosum	Cushman & Wickenden, 1929	https://www.marinespecies.org/aphia.php?p=taxdetails&id=418093
Elphidium sandiegoense	(Lankford, 1973)	https://www.marinespecies.org/aphia.php?p=taxdetails&id=478600	Cribrononion sandiegonensis
Elphidium spinatum	Cushman & Valentine, 1930	https://www.marinespecies.org/aphia.php?p=taxdetails&id=522965	Cribroelphidium spinatum
Elphidium translucens	Natland, 1938	https://www.marinespecies.org/aphia.php?p=taxdetails&id=113288	Cribroelphidium spinatum translucens, Cribroelphidium translucens, Elphidium translucens Natland
Elphidium tumidum	Bogdanovich, ?	https://www.marinespecies.org/aphia.php?p=taxdetails&id=1333283	Cellanthus tumidum, Cribroelphidium tumidum
Entzia macrescens	(Brady, 1870)	https://www.marinespecies.org/aphia.php?p=taxdetails&id=742429	Jadammina polystoma Bartenstein and Brand, 1938
Epistominella afueraensis	McCulloch, 1977	https://www.marinespecies.org/aphia.php?p=taxdetails&id=763864
Epistominella exigua	(Brady, 1884)	https://www.marinespecies.org/aphia.php?p=taxdetails&id=113334	Pseudoparrella exigua
Epistominella naraensis	(Kuwano, 1950)	https://www.marinespecies.org/aphia.php?p=taxdetails&id=113337
Epistominella obesa	Bandy & Arnal, 1957	https://www.marinespecies.org/aphia.php?p=taxdetails&id=522226
Epistominella sandiegoensis	Uchio, 1960	https://www.marinespecies.org/aphia.php?p=taxdetails&id=522137
Epistominella smithi	(Stewart & Stewart, 1930)	https://www.marinespecies.org/aphia.php?p=taxdetails&id=862706	Epistominella pacifica smithi (Stewart and Stewart), Pseudoparrella smithi
Eponides babsae	Brenner, 1962	https://www.marinespecies.org/aphia.php?p=taxdetails&id=528138
Eponides cribrorepandus	(Asano & Uchio, 1951)	https://www.marinespecies.org/aphia.php?p=taxdetails&id=418023	Poroeponides cribrorepandus
Eponides repandus	(Fichtel & Moll, 1798)	https://www.marinespecies.org/aphia.php?p=taxdetails&id=113356
Eponides turgidus	Phleger & Parker, 1951	https://www.marinespecies.org/aphia.php?p=taxdetails&id=113360	Gyroidina turgida
Eratidus foliaceus	(Brady, 1881)	https://www.marinespecies.org/aphia.php?p=taxdetails&id=398905	Ammobaculites foliaceus, Ammomarginulina foliacea
Eubuliminella exilis	(Brady, 1884)	https://www.marinespecies.org/aphia.php?p=taxdetails&id=417980	Bulimina elegans d’Orbigny var. exilis Brady, 1884, Bulimina exilis Brady var. tenuata (Cushman), Buliminella exilis (Cushman and Ellisor), Buliminella exilis, Buliminella subfusiformis var. tenuata Cushman, 1927, Buliminella tenuata Cushman, 1927, Eubuliminella tenuata (Cushman), Bulimina tenuata
Eubuliminella subfusiformis	(Cushman, 1925)	https://www.marinespecies.org/aphia.php?p=taxdetails&id=1468714	Buliminella subfusiformis
Euloxostomum bradyi	(Asano, 1938)	https://www.marinespecies.org/aphia.php?p=taxdetails&id=466353	Bolivina bradyi, Euloxostoma bradyi; Loxostomum bradyi; Loxostomum instabile Cushman and McCulloch, 1942; Loxostomun bradyi (Asano)
Euloxostomum pseudobeyrichi	(Cushman, 1926)	https://www.marinespecies.org/aphia.php?p=taxdetails&id=526537	Bolivina pseudobeyrichi ; Brizalina pseudobeyrichi; Loxostoma pseudobeyrichi; Loxostomum pseudoberychi,
Evolutinella rotulata	(Brady, 1881)	https://www.marinespecies.org/aphia.php?p=taxdetails&id=417575	Cribrostomoides rotulatum, Haplophragmoides rotulatum
Evolvocassidulina bradyi	(Norman, 1881)	https://www.marinespecies.org/aphia.php?p=taxdetails&id=466376	Cassidulinoides bradyi
Evolvocassidulina brevis	(Aoki, 1968)	https://www.marinespecies.org/aphia.php?p=taxdetails&id=526521
Evolvocassidulina tenuis	(Phleger & Parker, 1951)	https://www.marinespecies.org/aphia.php?p=taxdetails&id=466378	Cassidulinoides tenuis
Exsculptina exsculpta	(Brady, 1881)	https://www.marinespecies.org/aphia.php?p=taxdetails&id=466191	Fissurina exsculpta
Exsculptina pliocenica	(Cushman & Gray, 1946)	https://www.marinespecies.org/aphia.php?p=taxdetails&id=1296919	Lagena pliocenica
Exsculptina sidebottomi	(Earland, 1934)	https://www.marinespecies.org/aphia.php?p=taxdetails&id=760390	Lagena sidebottomi
Favocassidulina favus	(Brady, 1877)	https://www.marinespecies.org/aphia.php?p=taxdetails&id=484706
Favolagena digitalis	(Heron-Allen & Earland, 1932)	https://www.marinespecies.org/aphia.php?p=taxdetails&id=1033061	Lagena digitale
Favulina hexagona	(Williamson, 1848)	https://www.marinespecies.org/aphia.php?p=taxdetails&id=113193	Oolina hexagona
Favulina melo	(d'Orbigny, 1839)	https://www.marinespecies.org/aphia.php?p=taxdetails&id=113195	Oolina melo
Favulina squamosa	(Montagu, 1803)	https://www.marinespecies.org/aphia.php?p=taxdetails&id=466195	Lagena squamosa
Fijiella simplex	(Cushman, 1929)	https://www.marinespecies.org/aphia.php?p=taxdetails&id=526568	Reusella simplex
Fissurina (Fissurina) biancae	Seguenza, 1862	https://www.marinespecies.org/aphia.php?p=taxdetails&id=113199	Lagena biancae
Fissurina agassizi	Todd & Brönnimann, 1957	https://www.marinespecies.org/aphia.php?p=taxdetails&id=816062
Fissurina alveolata	(Brady, 1884)	https://www.marinespecies.org/aphia.php?p=taxdetails&id=113198
Fissurina annectens	(Burrows & Holland, 1895)	https://www.marinespecies.org/aphia.php?p=taxdetails&id=466197
Fissurina auriculata	(Brady, 1881)	https://www.marinespecies.org/aphia.php?p=taxdetails&id=466200
Fissurina bicarinata	Terquem, 1882	https://www.marinespecies.org/aphia.php?p=taxdetails&id=466520
Fissurina capillosa	Schwager, 1866	https://www.marinespecies.org/aphia.php?p=taxdetails&id=862712
Fissurina crebra	(Matthes, 1939)	https://www.marinespecies.org/aphia.php?p=taxdetails&id=581974
Fissurina cucurbitasema	Loeblich & Tappan, 1953	https://www.marinespecies.org/aphia.php?p=taxdetails&id=521017
Fissurina duplicata	(Sidebottom, 1912)	https://www.marinespecies.org/aphia.php?p=taxdetails&id=480272	Fissurina auriculata (Brady) var duplicata (Sidebottom)
Fissurina fimbriata	(Brady, 1881)	https://www.marinespecies.org/aphia.php?p=taxdetails&id=113203
Fissurina laevigata	Reuss, 1850	https://www.marinespecies.org/aphia.php?p=taxdetails&id=113205
Fissurina lucida	(Williamson, 1848)	https://www.marinespecies.org/aphia.php?p=taxdetails&id=113206
Fissurina marginata	(Montagu, 1803)	https://www.marinespecies.org/aphia.php?p=taxdetails&id=113207	Fissurina submarginata Boomgart 1949
Fissurina obscurocostata	Galloway & Wissler, 1927	https://www.marinespecies.org/aphia.php?p=taxdetails&id=913046
Fissurina orbignyana	Seguenza, 1862	https://www.marinespecies.org/aphia.php?p=taxdetails&id=113209
Fissurina pulchella	(Brady, 1867)	https://www.marinespecies.org/aphia.php?p=taxdetails&id=466230	Oolina pulchella
Fissurina sacculus	(Fornasini, 1901)	https://www.marinespecies.org/aphia.php?p=taxdetails&id=1353789	Lagena sacculus
Fissurina semimarginata	(Reuss, 1870)	https://www.marinespecies.org/aphia.php?p=taxdetails&id=113211
Fissurina seminiformis	(Schwager, 1866)	https://www.marinespecies.org/aphia.php?p=taxdetails&id=466239
Fissurina serrata	(Schlumberger, 1894)	https://www.marinespecies.org/aphia.php?p=taxdetails&id=113212	Lagena serrata
Fissurina solidata	McCulloch, 1977	https://www.marinespecies.org/aphia.php?p=taxdetails&id=466240
Fissurina spinosa	(Sidebottom, 1912)	https://www.marinespecies.org/aphia.php?p=taxdetails&id=417880
Fissurina staphyllearia	Schwager, 1866	https://www.marinespecies.org/aphia.php?p=taxdetails&id=113213	Fissurina kenguelenensis
Fissurina subformosa	Parr, 1950	https://www.marinespecies.org/aphia.php?p=taxdetails&id=293028
Flintinoides labiosa	(d'Orbigny, 1839)	https://www.marinespecies.org/aphia.php?p=taxdetails&id=112544	Triloculina labiosa
Francesita advena	(Cushman, 1922)	https://www.marinespecies.org/aphia.php?p=taxdetails&id=417961	Virgulina advena
Francuscia extensa	(Cushman, 1923)	https://www.marinespecies.org/aphia.php?p=taxdetails&id=417890	Pyrulina extensa
Frondicularia gigas	Church, 1929	https://www.marinespecies.org/aphia.php?p=taxdetails&id=528174
Fursenkoina apertura	(Uchio, 1960)	https://www.marinespecies.org/aphia.php?p=taxdetails&id=585272	Virgulina apertura
Fursenkoina bradyi	(Cushman, 1922)	https://www.marinespecies.org/aphia.php?p=taxdetails&id=113053	Cassidella bradyi, Virgulina bradyi
Fursenkoina bramlettei	(Galloway & Morrey, 1929)	https://www.marinespecies.org/aphia.php?p=taxdetails&id=417964	Virgulina bramlettei
Fursenkoina complanata	(Egger, 1893)	https://www.marinespecies.org/aphia.php?p=taxdetails&id=466392	Stainforthia complanata; Virgulina complanata
Fursenkoina cornuta	(Cushman, 1913)	https://www.marinespecies.org/aphia.php?p=taxdetails&id=862715	Cassidulinoides cornuta; Virgulina cornuta
Fursenkoina delicatula	(Uchio, 1960)	https://www.marinespecies.org/aphia.php?p=taxdetails&id=585273	Virgulina delicatula
Fursenkoina pauciloculata	(Brady, 1884)	https://www.marinespecies.org/aphia.php?p=taxdetails&id=417966	Virgulina pauciloculata
Fursenkoina pontoni	(Cushman, 1932)	https://www.marinespecies.org/aphia.php?p=taxdetails&id=417967
Fursenkoina punctata	(d'Orbigny, 1839)	https://www.marinespecies.org/aphia.php?p=taxdetails&id=417968
Fursenkoina sandiegoensis	(Uchio, 1960)	https://www.marinespecies.org/aphia.php?p=taxdetails&id=585275	Virgulina sandiegoensis
Fursenkoina seminuda	(Natland, 1938)	https://marinespecies.org/aphia.php?p=taxdetails&id=417969	Cassidella seminuda, Virgulina seminuda
Fursenkoina spinosa	(Heron-Allen & Earland, 1932)	https://www.marinespecies.org/aphia.php?p=taxdetails&id=585278
Fursenkoina subacuta	(d'Orbigny, 1852)	https://www.marinespecies.org/aphia.php?p=taxdetails&id=994413	Virgulina schreibersiana Czjzek, 1848
Fursenkoina tenuis	(Seguenza, 1862)	https://www.marinespecies.org/aphia.php?p=taxdetails&id=1417907	Virgulina tenuis
Fursenkoina texturata	(Brady, 1884)	https://www.marinespecies.org/aphia.php?p=taxdetails&id=480216	Coryphostoma subdepressa Brady 1884, Virgulina texturata
Gaudryina (Pseudogaudryina) excolata	Cushman, 1936	https://www.marinespecies.org/aphia.php?p=taxdetails&id=902770
Gaudryina arenaria	Galloway & Wissler, 1927	https://www.marinespecies.org/aphia.php?p=taxdetails&id=815450
Gaudryina glabrata	(Cushman, 1933)	https://www.marinespecies.org/aphia.php?p=taxdetails&id=926217
Gaudryina rugosa	d'Orbigny, 1840	https://www.marinespecies.org/aphia.php?p=taxdetails&id=409626
Gaudryina subglabrata	Cushman & McCulloch, 1939	https://www.marinespecies.org/aphia.php?p=taxdetails&id=522917
Gavelinopsis isabelleana	(d'Orbigny, 1839)	https://www.marinespecies.org/aphia.php?p=taxdetails&id=113157	Discorbina isabelleana
Gavelinopsis praegeri	(Heron-Allen & Earland, 1913)	https://www.marinespecies.org/aphia.php?p=taxdetails&id=113159	Discorbis praegeri
Gavelinopsis translucens	(Phleger & Parker, 1951)	https://www.marinespecies.org/aphia.php?p=taxdetails&id=113160	Rotalia translucens
Geminiella gibbera	(Buchner, 1940)	https://www.marinespecies.org/aphia.php?p=taxdetails&id=1037444	Lagena gibbera
Glabratella australensis	(Heron-Allen & Earland, 1932)	https://www.marinespecies.org/aphia.php?p=taxdetails&id=710346
Glabratella californiana	Lankford, 1973	https://www.marinespecies.org/aphia.php?p=taxdetails&id=862724
Glabratella lauriei	(Heron-Allen & Earland, 1924)	https://www.marinespecies.org/aphia.php?p=taxdetails&id=533743	Discorbis lauriei
Glabratella ornatissima	(Cushman, 1925)	https://www.marinespecies.org/aphia.php?p=taxdetails&id=585238	Trichohyalus ornatissima
Glandulina laevigata	(d'Orbigny, 1826)	https://www.marinespecies.org/aphia.php?p=taxdetails&id=113429	Pseudograndulina laevigata
Glaphyrammina americana	(Cushman, 1910)	https://www.marinespecies.org/aphia.php?p=taxdetails&id=417573	Ammobaculites americanus
Globobulimina affinis	(d'Orbigny, 1839)	https://www.marinespecies.org/aphia.php?p=taxdetails&id=113060	Bulimina afflnis
Globobulimina auriculata	(Bailey, 1894)	https://www.marinespecies.org/aphia.php?p=taxdetails&id=293027	Bulimina auriculata
Globobulimina barbata	(Cushman, 1927)	https://www.marinespecies.org/aphia.php?p=taxdetails&id=1551161	Bulimina barbata
Globobulimina hoeglundi	Uchio, 1960	https://www.marinespecies.org/aphia.php?p=taxdetails&id=522138
Globobulimina notovata	(Chapman, 1941)	https://www.marinespecies.org/aphia.php?p=taxdetails&id=815455	Bulimina notovata
Globobulimina ovata	(d'Orbigny, 1846)	https://www.marinespecies.org/aphia.php?p=taxdetails&id=1551163
Globobulimina ovula	(d'Orbigny, 1839)	https://www.marinespecies.org/aphia.php?p=taxdetails&id=417927
Globobulimina pacifica	Cushman, 1927	https://www.marinespecies.org/aphia.php?p=taxdetails&id=417928
Globobulimina pyrula	(d'Orbigny, 1846)	https://www.marinespecies.org/aphia.php?p=taxdetails&id=736617
Globobulimina subaffinis	(Cushman, 1921)	https://www.marinespecies.org/aphia.php?p=taxdetails&id=816215	Bulimina subaffinis
Globocassidulina bisecta	Nomura, 1983	https://www.marinespecies.org/aphia.php?p=taxdetails&id=526523
Globocassidulina crassa	(d'Orbigny, 1839)	https://www.marinespecies.org/aphia.php?p=taxdetails&id=397221	Cassidulina crassa; Cassidulina oblonga Reuss, 1850
Globocassidulina depressa	(Asano & Nakamura, 1937)	https://www.marinespecies.org/aphia.php?p=taxdetails&id=814825	Cassidulina depressa
Globocassidulina gemma	(Todd, 1954)	https://www.marinespecies.org/aphia.php?p=taxdetails&id=466383	Cassidulina gemma
Globocassidulina hooperi	Clark, 1994	https://www.marinespecies.org/aphia.php?p=taxdetails&id=556266	Cassidulina hooperi
Globocassidulina oblonga	(Reuss, 1850)	https://marinespecies.org/aphia.php?p=taxdetails&id=113090	Cassidulina oblonga
Globocassidulina producta	(Chapman & Parr, 1937)	https://www.marinespecies.org/aphia.php?p=taxdetails&id=466386	Cassidulina subglobosa producta
Globocassidulina rossensis	Kennett, 1967	https://www.marinespecies.org/aphia.php?p=taxdetails&id=1498330	Globocassidulina crassa subsp. Rossensis
Globocassidulina subglobosa	(Brady, 1881)	https://www.marinespecies.org/aphia.php?p=taxdetails&id=113091	Islandiella subglobosa
Globocassidulina subglobosa var. ornata	Cushman, 1927	https://marinespecies.org/aphia.php?p=taxdetails&id=525944
Globotextularia anceps	(Brady, 1884)	https://www.marinespecies.org/aphia.php?p=taxdetails&id=114237
Globulina gibba	(d'Orbigny in Deshayes, 1832)	https://www.marinespecies.org/aphia.php?p=taxdetails&id=113656
Globulina sororia	(Reuss, 1863)	https://www.marinespecies.org/aphia.php?p=taxdetails&id=113660	Polymorphina sororia
Glomospira charoides	(Jones & Parker, 1860)	https://www.marinespecies.org/aphia.php?p=taxdetails&id=113828	Usbekistania charoides
Glomospira compressa	Waters, 1928	https://www.marinespecies.org/aphia.php?p=taxdetails&id=898812
Glomospira gordialis	(Jones & Parker, 1860)	https://www.marinespecies.org/aphia.php?p=taxdetails&id=113830
Goesella flintii	Cushman, 1936	https://www.marinespecies.org/aphia.php?p=taxdetails&id=815458
Guttulina communis	(d'Orbigny, 1826)	https://www.marinespecies.org/aphia.php?p=taxdetails&id=113662	Guttulina problema d'Orbigny
Guttulina quinquecosta	Cushman & Ozawa (ms.), 1930	https://www.marinespecies.org/aphia.php?p=taxdetails&id=917430
Gyroidina altiformis	Stewart & Stewart, 1930	https://www.marinespecies.org/aphia.php?p=taxdetails&id=112894	Gyroidina soldanii var. altiformis
Gyroidina gemma	Bandy, 1953	https://www.marinespecies.org/aphia.php?p=taxdetails&id=848916
Gyroidina io	Resig, 1958	https://www.marinespecies.org/aphia.php?p=taxdetails&id=763951
Gyroidina lamarckiana	(d'Orbigny, 1839)	https://www.marinespecies.org/aphia.php?p=taxdetails&id=112896	Eponides lamarckianus
Gyroidina medicea	Emiliani, 1954	https://www.marinespecies.org/aphia.php?p=taxdetails&id=910665
Gyroidina nitidula	(Schwager, 1866)	https://www.marinespecies.org/aphia.php?p=taxdetails&id=585247
Gyroidina orbicularis	d'Orbigny in Parker, Jones & Brady, 1865	https://www.marinespecies.org/aphia.php?p=taxdetails&id=951876
Gyroidina polia	(Phleger & Parker, 1951)	https://www.marinespecies.org/aphia.php?p=taxdetails&id=112900	Eponides polius
Gyroidina quinqueloba	Uchio, 1960	https://www.marinespecies.org/aphia.php?p=taxdetails&id=522139
Gyroidina soldanii var. Multilocula	Coryell & Mossman, 1942	https://www.marinespecies.org/foraminifera/aphia.php?p=taxdetails&id=931023	Gyroidina soldanii d´Orbigny var. Multilocula
Gyroidina umbonata	(Silvestri, 1898)	https://www.marinespecies.org/aphia.php?p=taxdetails&id=112902
Gyroidinoides depressa	(Alth, 1850)	https://www.marinespecies.org/aphia.php?p=taxdetails&id=1531644	Valvalabamina depressa
Gyroidinoides dissimilis	(Cushman & Renz, 1947)	https://www.marinespecies.org/aphia.php?p=taxdetails&id=1539344
Gyroidinoides globosa	(Hagenow, 1842)	https://www.marinespecies.org/aphia.php?p=taxdetails&id=735525
Gyroidinoides subangulata	(Plummer, 1927)	https://www.marinespecies.org/aphia.php?p=taxdetails&id=735533
Gyroidinoides zelandica	(Finlay, 1939)	https://www.marinespecies.org/aphia.php?p=taxdetails&id=735535
Haeuslerella hoeglundi	(Uchio, 1960)	https://www.marinespecies.org/aphia.php?p=taxdetails&id=1494938	Bigenerina hoeglundi
Hansenisca multicamerata	(Kleinpell, 1938)	https://www.marinespecies.org/aphia.php?p=taxdetails&id=1351446	Gyroidina multicamerata
Hansenisca rotundimargo	(Stewart & Stewart, 1930)	https://www.marinespecies.org/aphia.php?p=taxdetails&id=1351457	Gyroidina soldanii d´Orbigny var. rotundimargo
Hansenisca soldanii	(d'Orbigny, 1826)	https://www.marinespecies.org/aphia.php?p=taxdetails&id=113418	Gyroidina neosoldanii Brotzen, 1936, Gyroidina soldani d´Orbigny (typing error?)
Hanzawaia americana	(Cushman, 1918)	https://www.marinespecies.org/aphia.php?p=taxdetails&id=1539403	Cibicides americanus (Cushman)
Hanzawaia basiloba	(Cushman, 1918)	https://www.marinespecies.org/aphia.php?p=taxdetails&id=1348416	Cibicides basiloba
Hanzawaia boueana	(d'Orbigny, 1846)	https://www.marinespecies.org/aphia.php?p=taxdetails&id=113185
Hanzawaia concentrica	(Cushman, 1918)	https://www.marinespecies.org/aphia.php?p=taxdetails&id=113186	Cibicides concentricus
Hanzawaia mexicana	Lankford, 1973	https://www.marinespecies.org/aphia.php?p=taxdetails&id=862716
Hanzawaia nipponica	Asano, 1944	https://www.marinespecies.org/aphia.php?p=taxdetails&id=527103
Hanzawaia nitidula	(Bandy, 1953)	https://www.marinespecies.org/aphia.php?p=taxdetails&id=113187
Hanzawaia prona	Poag, 1966	https://www.marinespecies.org/aphia.php?p=taxdetails&id=916481
Hanzawaia strattoni	(Applin, 1925)	https://www.marinespecies.org/aphia.php?p=taxdetails&id=418004
Haplophragmoides advena	Cushman, 1925	https://www.marinespecies.org/aphia.php?p=taxdetails&id=582612	Alveolophragmiuam advena, Labrospira advena, Haplophragmoides advenum
Haplophragmoides canariensis	(d'Orbigny, 1839)	https://www.marinespecies.org/aphia.php?p=taxdetails&id=113948
Haplophragmoides latidorsatus	(Bornemann, 1855)	https://www.marinespecies.org/aphia.php?p=taxdetails&id=1479568	Cribrostomoides latidorsatum
Haplophragmoides lenticularis	Natland, 1938	https://www.marinespecies.org/aphia.php?p=taxdetails&id=521616	Cribrostomoides lenticulare
Haplophragmoides neobradyi	Uchio, 1960	https://www.marinespecies.org/aphia.php?p=taxdetails&id=465981
Haplophragmoides planissima	Cushman, 1927	https://www.marinespecies.org/aphia.php?p=taxdetails&id=522696	Glaphyrammina planissima, Ammotium planissimum
Haplophragmoides pusillus	Collins, 1974	https://www.marinespecies.org/aphia.php?p=taxdetails&id=917173
Haplophragmoides sandiegoensis	Uchio, 1961	https://www.marinespecies.org/aphia.php?p=taxdetails&id=528482	Haplophragmoides quadratus
Hauerina ornatissima	(Karrer, 1868)	https://www.marinespecies.org/aphia.php?p=taxdetails&id=582353
Haynesina depressula	(Walker & Jacob, 1798)	https://www.marinespecies.org/aphia.php?p=taxdetails&id=113293	Nonion depressulum
Haynesina germanica	(Ehrenberg, 1840)	https://www.marinespecies.org/aphia.php?p=taxdetails&id=113294
Heronallenia gemmata	Earland, 1934	https://www.marinespecies.org/aphia.php?p=taxdetails&id=418044
Heterocassidulina irregularis	McCulloch, 1977	https://www.marinespecies.org/aphia.php?p=taxdetails&id=764046
Heterolepa bradyi	(Trauth, 1918)	https://www.marinespecies.org/aphia.php?p=taxdetails&id=736954	Cibicides bradyi; Cibicidoides bradi ; Heterolepa bradyi; Parreroides bradyi
Heterolepa broeckhiana	(Karrer, 1878)	https://www.marinespecies.org/aphia.php?p=taxdetails&id=736955	Gyroidina broeckhina
Hippocrepina indivisa	Parker, 1870	https://www.marinespecies.org/aphia.php?p=taxdetails&id=113871
Hoeglundina elegans	(d'Orbigny, 1826)	https://www.marinespecies.org/aphia.php?p=taxdetails&id=113341
Homalohedra acuticosta	(Reuss, 1862)	https://www.marinespecies.org/aphia.php?p=taxdetails&id=723196	Lagena acuticosta; Oolina acuticosta
Hopkinsina hancocki	Todd, 1948	https://www.marinespecies.org/aphia.php?p=taxdetails&id=528459	Uvigerina hancocki, Bifarina hancocki
Hopkinsina pacifica	Cushman, 1933	https://www.marinespecies.org/aphia.php?p=taxdetails&id=113728
Hormosina bacillaris	(Brady, 1881)	https://www.marinespecies.org/aphia.php?p=taxdetails&id=113976	Reophax bacillaris
Hormosina globulifera	Brady, 1879	https://www.marinespecies.org/aphia.php?p=taxdetails&id=113979
Hormosina monile	Cushman, 1912	https://www.marinespecies.org/aphia.php?p=taxdetails&id=582623
Hormosina normani	(Brady, 1881)	https://www.marinespecies.org/aphia.php?p=taxdetails&id=113980
Hormosinella carpenteri	(Brady, 1881)	https://www.marinespecies.org/aphia.php?p=taxdetails&id=113983
Hormosinella distans	(Brady, 1881)	https://www.marinespecies.org/aphia.php?p=taxdetails&id=113984	Hormosinella distans, Reophax distans
Hormosinella gracilis	(Earland, 1933)	https://www.marinespecies.org/aphia.php?p=taxdetails&id=581982	Reophax gracilis
Hormosinella ovicula	(Brady, 1879)	https://www.marinespecies.org/aphia.php?p=taxdetails&id=113986	Hormosinella ovicula
Hormosinelloides guttifer	(Brady, 1881)	https://www.marinespecies.org/aphia.php?p=taxdetails&id=849852	Reophax guttifer, Hormosinella guttifera
Hormosinelloides hispidula	(Cushman, 1920)	https://www.marinespecies.org/aphia.php?p=taxdetails&id=849853	Reophax hispidulus
Hyalinonetrion clavatum	(d'Orbigny, 1846)	https://www.marinespecies.org/aphia.php?p=taxdetails&id=1467855	Lagena clavata, Procerolagena clavata
Hyalinonetrion elongatum	(Ehrenberg, 1844)	https://www.marinespecies.org/aphia.php?p=taxdetails&id=723201	Lagena elongata
Hyalinonetrion gracile	(Costa, 1856)	https://www.marinespecies.org/aphia.php?p=taxdetails&id=113482	Lagena gracillima
Hyalinonetrion gracillimum	(Seguenza, 1862)	https://www.marinespecies.org/aphia.php?p=taxdetails&id=466138	Procerolagena gracillima; Lagena gracillima
Hyperammina cylindrica	Parr, 1950	https://www.marinespecies.org/aphia.php?p=taxdetails&id=113967
Hyperammina elongata	Brady, 1878	https://www.marinespecies.org/aphia.php?p=taxdetails&id=113968
Hyperammina friabilis	Brady, 1884	https://www.marinespecies.org/aphia.php?p=taxdetails&id=113970	Hyperammina friabilis Cushman and Water, 1928 (species not found in Worms, cited in Liu, 2001)
Hyperammina laevigata	Wright, 1891	https://www.marinespecies.org/aphia.php?p=taxdetails&id=113971
Involutina pacifica	(Cushman & Valentine, 1930)	https://www.marinespecies.org/aphia.php?p=taxdetails&id=815664	Ammodiscus pacificus, Ammodiscus incertus pacificus
Ioanella tumidula	(Brady, 1884)	https://www.marinespecies.org/aphia.php?p=taxdetails&id=113363	Eponides tumidulus
Islandiella australis	(Phleger & Parker, 1951)	https://www.marinespecies.org/aphia.php?p=taxdetails&id=113092	Islandiella norcrossi australis
Islandiella californica	(Cushman & Hughes, 1925)	https://www.marinespecies.org/aphia.php?p=taxdetails&id=815665	Cassidulina californica
Islandiella islandica	(Nørvang, 1945)	https://www.marinespecies.org/aphia.php?p=taxdetails&id=113094	Cassidulina islandica cf. minuta Nørvang, 1945; Cassidulina islandica
Islandiella norcrossi	(Cushman, 1933)	https://www.marinespecies.org/aphia.php?p=taxdetails&id=113095	Cassidulina norcrossi
Islandiella smechovi	(Voloshinova, 1952)	https://www.marinespecies.org/aphia.php?p=taxdetails&id=1259057	Cassidulina semchovi
Islandiella subdelicata	Golik, 1977	https://www.marinespecies.org/aphia.php?p=taxdetails&id=862717
Jaculella acuta	Brady, 1879	https://www.marinespecies.org/aphia.php?p=taxdetails&id=113879	Jacutella sp. (spelling mistake in Heinz et al., 2008?)
Karreriella baccata	(Schwager, 1866)	https://www.marinespecies.org/aphia.php?p=taxdetails&id=525579
Karreriella bradyi	(Cushman, 1911)	https://www.marinespecies.org/aphia.php?p=taxdetails&id=113941
Karreriella novangliae	(Cushman, 1922)	https://www.marinespecies.org/aphia.php?p=taxdetails&id=113942
Karreriella parkerae	Uchio, 1960	https://www.marinespecies.org/aphia.php?p=taxdetails&id=522142
Karrerulina conversa	(Grzybowski, 1901)	https://www.marinespecies.org/aphia.php?p=taxdetails&id=254688	Karreriella apicularis (Cushman)
Labrospira columbiensis	(Cushman, 1925)	https://www.marinespecies.org/aphia.php?p=taxdetails&id=525581	Alveolophragmium columbiensis, Haplophragmoides columbiense
Labrospira crassimargo	(Norman, 1892)	https://www.marinespecies.org/aphia.php?p=taxdetails&id=113957	Alveolophragmium crassimargo, Cribrostomoides crassimargo
Labrospira robusta	Cushman & McCulloch, 1948	https://www.marinespecies.org/aphia.php?p=taxdetails&id=849874	Alveolophragmium columbiense (Cushman) robusta (Cushman and McCulloch), Haplophragmoides columbiensis Cushman var. Evolutus Cushman and McCulloch, 1939 (spelling mistake?)
Laevidentalina advena	(Cushman, 1923)	https://www.marinespecies.org/aphia.php?p=taxdetails&id=417813	Dentalina advena (Cushman)
Laevidentalina ariena	(Patterson & Pettis, 1986)	https://www.marinespecies.org/aphia.php?p=taxdetails&id=466109	Dentalina intorta
Laevidentalina baggi	(Galloway & Wissler, 1927)	https://www.marinespecies.org/aphia.php?p=taxdetails&id=723205	Dentalina baggi
Laevidentalina californica	(Cushman & Gray, 1946)	https://www.marinespecies.org/aphia.php?p=taxdetails&id=503202	Dentalina californica
Laevidentalina communis	(d'Orbigny, 1826)	https://www.marinespecies.org/aphia.php?p=taxdetails&id=556616	Dentalina communis
Laevidentalina filiformis	(d'Orbigny, 1826)	https://www.marinespecies.org/aphia.php?p=taxdetails&id=113527	Dentalina filiformis
Laevidentalina subsoluta	(Cushman, 1923)	https://www.marinespecies.org/aphia.php?p=taxdetails&id=723207	Dentalina subsoluta
Lagena agasma	Boltovskoy & Giussani de Kahn, 1990	https://www.marinespecies.org/aphia.php?p=taxdetails&id=1315617	Lagena amphora Reuss, 1862
Lagena aspera	Reuss, 1862	https://www.marinespecies.org/aphia.php?p=taxdetails&id=113486
Lagena caudata	(d'Orbigny, 1839)	https://www.marinespecies.org/aphia.php?p=taxdetails&id=849890
Lagena dentaliformis	Bagg, 1912	https://www.marinespecies.org/aphia.php?p=taxdetails&id=900882
Lagena elegantissima	(Bornemann, 1855)	https://www.marinespecies.org/aphia.php?p=taxdetails&id=932814
Lagena elongata	Konenkova, 2001	https://www.marinespecies.org/aphia.php?p=taxdetails&id=1049340
Lagena filicosta	Reuss, 1863	https://www.marinespecies.org/aphia.php?p=taxdetails&id=738351
Lagena hispida	Reuss, 1863	https://www.marinespecies.org/aphia.php?p=taxdetails&id=113495
Lagena hispidula	Cushman, 1913	https://www.marinespecies.org/aphia.php?p=taxdetails&id=113496	Pygmaeoseistron hispidula
Lagena interrupta	Williamson, 1848	https://www.marinespecies.org/aphia.php?p=taxdetails&id=417792
Lagena laevicostata	Cushman & Gray, 1946	https://www.marinespecies.org/aphia.php?p=taxdetails&id=466146
Lagena lyellii	(Seguenza, 1862)	https://www.marinespecies.org/aphia.php?p=taxdetails&id=466148
Lagena nebulosa	Cushman, 1923	https://www.marinespecies.org/aphia.php?p=taxdetails&id=113500
Lagena parri	Loeblich & Tappan, 1953	https://www.marinespecies.org/aphia.php?p=taxdetails&id=521018
Lagena parvulipora	Bandy, 1949	https://www.marinespecies.org/aphia.php?p=taxdetails&id=914585	Lagena elliptica Bandy, 1889
Lagena perlucida	(Montagu, 1803)	https://www.marinespecies.org/aphia.php?p=taxdetails&id=113503
Lagena semilineata	Wright, 1886	https://www.marinespecies.org/aphia.php?p=taxdetails&id=577950
Lagena sesquistriata	Bagg, 1912	https://www.marinespecies.org/aphia.php?p=taxdetails&id=417797
Lagena spicata	Cushman & McCulloch, 1950	https://www.marinespecies.org/aphia.php?p=taxdetails&id=113505	Lagena sulcata var. spicata
Lagena spirata	Bandy, 1949	https://www.marinespecies.org/aphia.php?p=taxdetails&id=417800
Lagena striata	(d'Orbigny, 1839)	https://www.marinespecies.org/aphia.php?p=taxdetails&id=113507
Lagena submagnifica	Cushman & Gray, 1946	https://www.marinespecies.org/aphia.php?p=taxdetails&id=921528
Lagena substriata	Williamson, 1848	https://www.marinespecies.org/aphia.php?p=taxdetails&id=113508
Lagena sulcata	(Walker & Jacob, 1798)	https://www.marinespecies.org/aphia.php?p=taxdetails&id=113509
Lagena tenuistriata	Stache, 1864	https://www.marinespecies.org/aphia.php?p=taxdetails&id=734886
Lagenammina ampullacea	Crespin, 1961	https://www.marinespecies.org/aphia.php?p=taxdetails&id=895231	1
Lagenammina arenulata	(Skinner, 1961)	https://www.marinespecies.org/aphia.php?p=taxdetails&id=114163
Lagenammina atlantica	(Cushman, 1944)	https://www.marinespecies.org/aphia.php?p=taxdetails&id=114164	Proteonina atlantica, Reophax atlantica, Saccammina atlanticus
Lagenammina difflugiformis	(Brady, 1879)	https://www.marinespecies.org/aphia.php?p=taxdetails&id=114165	Reophax difflugiformis
Lagenammina tubulata	(Rhumbler, 1931)	https://www.marinespecies.org/aphia.php?p=taxdetails&id=254689	Saccammina tubulata
Lagenosolenia bradyiformata	McCulloch, 1977	https://www.marinespecies.org/aphia.php?p=taxdetails&id=509262
Laryngosigma hyalascidia	Loeblich & Tappan, 1953	https://www.marinespecies.org/aphia.php?p=taxdetails&id=113670
Laticarinina pauperata	(Parker & Jones, 1865)	https://www.marinespecies.org/aphia.php?p=taxdetails&id=113162	Dentalina pauperata
Lenticulina adelinensis	(Keijzer, 1945)	https://www.marinespecies.org/aphia.php?p=taxdetails&id=1472892
Lenticulina atlantica	(Barker, 1960)	https://www.marinespecies.org/aphia.php?p=taxdetails&id=113783
Lenticulina convergens	(Bornemann, 1855)	https://www.marinespecies.org/aphia.php?p=taxdetails&id=417835
Lenticulina cultrata	(Montfort, 1808)	https://www.marinespecies.org/aphia.php?p=taxdetails&id=113785	Robulus cultratus
Lenticulina cushmani	(Galloway & Wissler, 1927)	https://www.marinespecies.org/aphia.php?p=taxdetails&id=736671	Robulus cushmani
Lenticulina gibba	(d'Orbigny, 1839)	https://www.marinespecies.org/aphia.php?p=taxdetails&id=113788
Lenticulina mamilligera	(Karrer, 1864)	https://www.marinespecies.org/aphia.php?p=taxdetails&id=710318
Lenticulina melvilli	(Cushman & Renz, 1941)	https://www.marinespecies.org/foraminifera/aphia.php?p=taxdetails&id=1443337
Lenticulina nikobarensis	(Schwager, 1866)	https://www.marinespecies.org/aphia.php?p=taxdetails&id=852168
Lenticulina orbicularis	(d'Orbigny, 1826)	https://www.marinespecies.org/aphia.php?p=taxdetails&id=113790
Lenticulina papillosa	(d'Orbigny, 1826)	https://www.marinespecies.org/aphia.php?p=taxdetails&id=484666	Robulus papillosus
Lenticulina pliocaena	(Silvestri, 1898)	https://www.marinespecies.org/aphia.php?p=taxdetails&id=484661
Lenticulina rotulata	(Lamarck, 1804)	https://www.marinespecies.org/aphia.php?p=taxdetails&id=582681	Robulus rotulatus
Lenticulina strongi	(Church, 1929)	https://www.marinespecies.org/aphia.php?p=taxdetails&id=1453244	Robulus strongi
Lenticulina thalmanni	(Hessland, 1943)	https://www.marinespecies.org/aphia.php?p=taxdetails&id=417842	Robulus thalmanni
Lepidodeuterammina ochracea	(Williamson, 1858)	https://www.marinespecies.org/aphia.php?p=taxdetails&id=114306
Leptohalysis catella	(Höglund, 1947)	https://www.marinespecies.org/aphia.php?p=taxdetails&id=736676
Leptohalysis gracilis	(Kiær, 1900)	https://www.marinespecies.org/aphia.php?p=taxdetails&id=741091	Reophax gracilis
Leptohalysis scottii	(Chaster, 1892)	https://www.marinespecies.org/aphia.php?p=taxdetails&id=578704	Reophax scottii
Lernella inflata	(LeRoy, 1944)	https://www.marinespecies.org/aphia.php?p=taxdetails&id=466389	Cassidulina inflata
Lobatula lobatula	(Walker & Jacob, 1798)	https://www.marinespecies.org/aphia.php?p=taxdetails&id=113118	Cibicides lobatus, Cibicidoides lobatulus
Loeblichopsis cylindrica	(Brady, 1884)	https://www.marinespecies.org/aphia.php?p=taxdetails&id=113881	Reophax cylindricus
Lotostomoides calomorpha	(Reuss, 1866)	https://www.marinespecies.org/aphia.php?p=taxdetails&id=711518	Glandulinodosaria calomorpha, Nodosaria calomorpha
Loxostomina amygdalaeformis	(Brady, 1881)	https://www.marinespecies.org/aphia.php?p=taxdetails&id=490040	Loxostomum amygdaliformis
Loxostomina costulata	(Cushman, 1922)	https://www.marinespecies.org/aphia.php?p=taxdetails&id=417934	Loxostomum limbatum (Brady) var. costulatum
Loxostomina limbata	(Brady, 1881)	https://www.marinespecies.org/aphia.php?p=taxdetails&id=113015	Loxostomum limbatum, Rectobolivina limbata
Loxostomina mayori	(Cushman, 1922)	https://www.marinespecies.org/aphia.php?p=taxdetails&id=417935	Bolivina (Loxostomum) mayori
Loxostomum subrostratum	Ehrenberg, 1854	https://www.marinespecies.org/aphia.php?p=taxdetails&id=921685
Lugdunum hantkenianum	(Brady, 1881)	https://www.marinespecies.org/aphia.php?p=taxdetails&id=480221	Bolivina hantkeniana
Marginulina obesa	Cushman, 1923	https://www.marinespecies.org/aphia.php?p=taxdetails&id=183260
Marsipella elongata	Norman, 1878	https://www.marinespecies.org/aphia.php?p=taxdetails&id=113885
Martinottiella communis	(d'Orbigny, 1846)	https://www.marinespecies.org/aphia.php?p=taxdetails&id=113913	Clavulina communis, Martinottiella bradyana (Cushman, 1936)
Martinottiella nodulosa	Cushman, 1933	https://www.marinespecies.org/aphia.php?p=taxdetails&id=412988	Martinottiella communis nodulosa
Martinottiella occidentalis	(Cushman, 1922)	https://www.marinespecies.org/aphia.php?p=taxdetails&id=417639
Martinottiella pallida	(Cushman, 1927)	https://www.marinespecies.org/aphia.php?p=taxdetails&id=829305	Schenckiella pallida, Martinottiella communis pallida
Martinottiella primaeva	(Cushman, 1913)	https://www.marinespecies.org/aphia.php?p=taxdetails&id=849977	Schenckiella primaeva
Massilina pulcherrima	Cushman & Valentine, 1930	https://www.marinespecies.org/aphia.php?p=taxdetails&id=522967
Massilina pulchra	Cushman & Gray, 1946	https://www.marinespecies.org/aphia.php?p=taxdetails&id=916978
Massilina robustior	Cushman & Valentine, 1930	https://www.marinespecies.org/aphia.php?p=taxdetails&id=522968
Melonis affinis	(Reuss, 1851)	https://www.marinespecies.org/aphia.php?p=taxdetails&id=418046	Melonis affine, Nonion affine, Melonis barleeanum, Melonis barleeanus, Nonion barleeanus
Melonis guadalupae	Parker, 1964	https://www.marinespecies.org/aphia.php?p=taxdetails&id=905103	Melonis guadalupe Parker, 1964
Melonis parkerae	(Uchio, 1960)	https://www.marinespecies.org/aphia.php?p=taxdetails&id=736685	Nonion parkerae
Melonis pompilioides	(Fichtel & Moll, 1798)	https://www.marinespecies.org/aphia.php?p=taxdetails&id=113564
Melonis simplex	(Karrer, 1864)	https://www.marinespecies.org/aphia.php?p=taxdetails&id=735630
Metapolymorphina charlottensis	(Cushman, 1925)	https://www.marinespecies.org/aphia.php?p=taxdetails&id=760043	Polymorphina charlottensis
Microglabratella globosa	(Sidebottom, 1909)	https://www.marinespecies.org/aphia.php?p=taxdetails&id=1057252	Discorbis globosus
Migros flintii	(Cushman, 1911)	https://www.marinespecies.org/aphia.php?p=taxdetails&id=417641	Gaudryina flintii
Miliammellus legis	Saidova & Burmistrova, 1978	https://www.marinespecies.org/aphia.php?p=taxdetails&id=759751
Miliammina arenacea	(Chapman, 1916)	https://www.marinespecies.org/aphia.php?p=taxdetails&id=114063
Miliammina earlandi	Loeblich & Tappan, 1955	https://www.marinespecies.org/aphia.php?p=taxdetails&id=528501
Miliammina fusca	(Brady, 1870)	https://www.marinespecies.org/aphia.php?p=taxdetails&id=114064
Miliolinella californica	Rhumbler, 1936	https://www.marinespecies.org/aphia.php?p=taxdetails&id=417685
Miliolinella circularis	(Bornemann, 1855)	https://www.marinespecies.org/aphia.php?p=taxdetails&id=417686	Triloculina circularis
Miliolinella fichteliana	(d'Orbigny, 1839)	https://www.marinespecies.org/aphia.php?p=taxdetails&id=417687	Triloculina fichteliana
Miliolinella suborbicularis	(d'Orbigny, 1839)	https://www.marinespecies.org/aphia.php?p=taxdetails&id=417689	Pateoris suborbicularis
Miliolinella subrotunda	(Montagu, 1803)	https://www.marinespecies.org/aphia.php?p=taxdetails&id=112564	Pateoris hauerinoides
Montfortella bramlettei	Loeblich & Tappan, 1963	https://www.marinespecies.org/aphia.php?p=taxdetails&id=521025
Mucronina compressa	(Costa, 1855)	https://www.marinespecies.org/aphia.php?p=taxdetails&id=480296	Frondicularia advena Cushman, Parafrondicularia advena. Plectofrondicularia advena
Neoconorbina terquemi	(Rzehak, 1888)	https://www.marinespecies.org/aphia.php?p=taxdetails&id=113697	Discorbis orbicularis (Terquem)
Neoeponides antillarum	(d'Orbigny, 1839)	https://www.marinespecies.org/aphia.php?p=taxdetails&id=557012	Eponides antillarum
Neoeponides campester	(Palmer & Bermúdez	https://www.marinespecies.org/aphia.php?p=taxdetails&id=1539341
Nodellum membranaceum	(Brady, 1879)	https://www.marinespecies.org/aphia.php?p=taxdetails&id=112434
Nodobaculariella atlantica	Cushman & Hanzawa, 1937	https://www.marinespecies.org/aphia.php?p=taxdetails&id=417767
Nodobaculariella cassis	(d'Orbigny, 1839)	https://www.marinespecies.org/aphia.php?p=taxdetails&id=417768
Nodosaria (Dentalina) strigosa	Costa, 1856	https://www.marinespecies.org/foraminifera/aphia.php?p=taxdetails&id=921085	Dentalina strigosa
Nodosaria profunda	Saidova, 1975	https://www.marinespecies.org/aphia.php?p=taxdetails&id=521887	Nodosaria profunda d´Orbigny (species not found in Worms, authority mistake, in Nienstedt, 1986?
Nodosaria scalaris	d'Orbigny, 1826	https://www.marinespecies.org/aphia.php?p=taxdetails&id=919082
Nodosinum gaussicum	(Rhumbler, 1913)	https://www.marinespecies.org/aphia.php?p=taxdetails&id=491736
Nodulina dentaliniformis	(Brady, 1881)	https://www.marinespecies.org/aphia.php?p=taxdetails&id=113988	Reophax dentaliniformis
Nonion commune	(d'Orbigny, 1846)	https://www.marinespecies.org/aphia.php?p=taxdetails&id=113585	Nonion scapha (Fitchel and Moll), Nonion scaphum (Fichtel and Moll)
Nonion incisum	(Cushman, 1926)	https://www.marinespecies.org/aphia.php?p=taxdetails&id=926527	Nonionella incisa
Nonion lankfordi	Uchio, 1960	https://www.marinespecies.org/aphia.php?p=taxdetails&id=522143
Nonion mexicanum	Cole, 1927	https://www.marinespecies.org/aphia.php?p=taxdetails&id=735635
Nonion schwageri	Cushman, 1936	https://www.marinespecies.org/aphia.php?p=taxdetails&id=919235	Astrononion schwageri
Nonionella astricta	McCulloch, 1965	https://www.marinespecies.org/aphia.php?p=taxdetails&id=418048	Nonionella mexicana, Nonionella japonica var. Mexicana, Florilus mexicanus (Cushman and McCulloch)
Nonionella auricula	Heron-Allen & Earland, 1930	https://www.marinespecies.org/aphia.php?p=taxdetails&id=113598	Florilus auriculatus; Florilus auriculus
Nonionella auris	(d'Orbigny, 1839)	https://www.marinespecies.org/aphia.php?p=taxdetails&id=466467
Nonionella basiloba	Cushman & McCulloch, 1940	https://www.marinespecies.org/aphia.php?p=taxdetails&id=418049
Nonionella basispinata	(Cushman & Moyer, 1930)	https://www.marinespecies.org/aphia.php?p=taxdetails&id=862719	Florilus basispinata; Florilus basispinatus; Pseudononion basispinata; Pseudononion basispinatum; Florilus scaphus basispinatus
Nonionella bradii	(Chapman, 1916)	https://www.marinespecies.org/aphia.php?p=taxdetails&id=397142
Nonionella davanaensis	Pierce, 1956	https://www.marinespecies.org/aphia.php?p=taxdetails&id=900576
Nonionella digitata	Nørvang, 1945	https://www.marinespecies.org/aphia.php?p=taxdetails&id=113600	Nonionella turgida digitata
Nonionella fragilis	Uchio, 1960	https://www.marinespecies.org/aphia.php?p=taxdetails&id=522144
Nonionella globosa	Ishiwada, 1950	https://www.marinespecies.org/aphia.php?p=taxdetails&id=528341
Nonionella miocenica	Cushman, 1926	https://www.marinespecies.org/aphia.php?p=taxdetails&id=522945
Nonionella monicana	Zalesny, 1959	https://www.marinespecies.org/aphia.php?p=taxdetails&id=911628
Nonionella pulchella	Dzhanelidze, 1958	https://www.marinespecies.org/aphia.php?p=taxdetails&id=1336900
Nonionella stella	Cushman & Moyer, 1930	https://www.marinespecies.org/aphia.php?p=taxdetails&id=113604	Nonionella miocenica Cushman var. Stella
Nonionellina labradorica	(Dawson, 1860)	https://www.marinespecies.org/aphia.php?p=taxdetails&id=113606	Florilus labradoricus, Nonion labradoricum, Nonionella labradorica, Nonionellina labradorica
Nonionoides grateloupii	(d'Orbigny, 1839)	https://www.marinespecies.org/aphia.php?p=taxdetails&id=418051	Nonion grateloupi, Nonionella grateloupi, Nonionoides grateloupi
Nonionoides turgidus	(Williamson, 1858)	https://www.marinespecies.org/aphia.php?p=taxdetails&id=466471	Nonionella turgida
Notorotalia clathrata	(Brady, 1884)	https://www.marinespecies.org/aphia.php?p=taxdetails&id=545295
Nouria polymorphinoides	Heron-Allen & Earland, 1914	https://www.marinespecies.org/aphia.php?p=taxdetails&id=114061
Novosigmella edwardsi	(Schlumberger, 1887)	https://www.marinespecies.org/aphia.php?p=taxdetails&id=1063123	Sigmoilina edwardsi
Nuttallides umbonifer	(Cushman, 1933)	https://www.marinespecies.org/aphia.php?p=taxdetails&id=466429	Epistominella umbonifera; Nuttalides umbonifera; Nuttallides umbonifer
Nuttallinella florealis	(White, 1928)	https://www.marinespecies.org/aphia.php?p=taxdetails&id=1027943	Nutalinela florealis (White), spelling mistake? in Liu, 2001
Obesopleurostomella brevis	(Schwager, 1866)	https://www.marinespecies.org/aphia.php?p=taxdetails&id=720651	Pleurostomella brevis
Oolina apiopleura	(Loeblich & Tappan, 1953)	https://www.marinespecies.org/aphia.php?p=taxdetails&id=113217	Lagena apiopleura
Oolina borealis	Loeblich & Tappan, 1954	https://www.marinespecies.org/aphia.php?p=taxdetails&id=113218	Homalohedra costata (Williamson, 1848), Lagena costata (Williamson), Oolina borealis Loeblich & Tappan, Entosolenia costata Williamson, 1858
Oolina globosa	(Montagu, 1803)	https://www.marinespecies.org/aphia.php?p=taxdetails&id=113219
Oolina laevigata	d'Orbigny, 1839	https://www.marinespecies.org/aphia.php?p=taxdetails&id=113222
Oolina lineata	(Williamson, 1848)	https://www.marinespecies.org/aphia.php?p=taxdetails&id=113223
Oolina ovum	(Ehrenberg, 1843)	https://www.marinespecies.org/aphia.php?p=taxdetails&id=113226
Oolina setosa	(Earland, 1934)	https://www.marinespecies.org/aphia.php?p=taxdetails&id=466282	Oolina globosa (Montagu) var. Setosa (Earland)
Oolina stelligera	(Brady, 1881)	https://www.marinespecies.org/aphia.php?p=taxdetails&id=466283	Lagena stelligera
Oolina vilardeboana	d'Orbigny, 1839	https://www.marinespecies.org/aphia.php?p=taxdetails&id=933716
Oridorsalis pauciapertura	Belford, 1966	https://www.marinespecies.org/aphia.php?p=taxdetails&id=914660
Oridorsalis stellatus	(Silvestri, 1898)	https://www.marinespecies.org/foraminifera.../aphia.php?p=taxdetails&id=1550986	Pseudoeponides tener stellatus
Oridorsalis subtener	(Galloway & Wissler, 1927)	https://www.marinespecies.org/foraminifera/aphia.php?p=taxdetails&id=1551067	Eponides subtener; Eponides subtenerus; Gyroidina subtenera; Gyroidina subtener; Eponides subtenera
Oridorsalis tener	(Brady, 1884)	https://www.marinespecies.org/aphia.php?p=taxdetails&id=523545	Pseudoponides tener; Eponides tener
Oridorsalis tener	(Brady, 1884)	https://www.marinespecies.org/aphia.php?p=taxdetails&id=523617
Oridorsalis umbonatus	(Reuss, 1851)	https://www.marinespecies.org/aphia.php?p=taxdetails&id=254690	Eponides umbonatus; Pseudoeponides umbonatus
Osangularia bengalensis	(Schwager, 1866)	https://www.marinespecies.org/aphia.php?p=taxdetails&id=466406
Osangularia culter	(Parker & Jones, 1865)	https://www.marinespecies.org/aphia.php?p=taxdetails&id=112841
Osangularia mexicana	(Cole, 1927)	https://www.marinespecies.org/Foraminifera/aphia.php?p=taxdetails&id=1531124
Osangulariella bradyi	(Earland, 1934)	https://www.marinespecies.org/aphia.php?p=taxdetails&id=466397	Eponides bradyi
Palliolatella bradii	(Silvestri, 1902)	https://www.marinespecies.org/aphia.php?p=taxdetails&id=490023
Parabrizalina porrecta	(Brady, 1881)	https://www.marinespecies.org/aphia.php?p=taxdetails&id=417921	Loxostoma porrecta
Paracassidulina angulosa	(Cushman, 1933)	https://www.marinespecies.org/aphia.php?p=taxdetails&id=723244	Cassidulina angulosa
Paracassidulina minuta	(Cushman, 1933)	https://www.marinespecies.org/aphia.php?p=taxdetails&id=526529	Globocassidulina minuta; Cassidulina minuta
Paracassidulina neocarinata	(Thalmann, 1950)	https://www.marinespecies.org/aphia.php?p=taxdetails&id=113097
Parafissurina fusuliformis	Loeblich & Tappan, 1953	https://www.marinespecies.org/aphia.php?p=taxdetails&id=113232
Parafissurina lateralis	(Cushman, 1913)	https://www.marinespecies.org/aphia.php?p=taxdetails&id=113234
Parafissurina subcarinata	Parr, 1950	https://www.marinespecies.org/aphia.php?p=taxdetails&id=816040
Parafissurina sublata	Parr, 1950	https://www.marinespecies.org/aphia.php?p=taxdetails&id=466306
Parafissurina ventricosa	(Silvestri, 1904)	https://www.marinespecies.org/aphia.php?p=taxdetails&id=466308
Paratrochammina challengeri	Brönnimann & Whittaker, 1988	https://www.marinespecies.org/aphia.php?p=taxdetails&id=417610
Paratrochammina charlottensis	(Cushman, 1925)	https://www.marinespecies.org/aphia.php?p=taxdetails&id=850008	Trochammina charlottensis
Paratrochammina scotiaensis	Brönnimann & Whittaker, 1988	https://www.marinespecies.org/aphia.php?p=taxdetails&id=1469011
Parrelloides healdi	(Stewart & Stewart, 1930)	https://www.marinespecies.org/aphia.php?p=taxdetails&id=1551169	Eponides healdi
Patellina corrugata	Williamson, 1858	https://www.marinespecies.org/aphia.php?p=taxdetails&id=113626
Pelosina didera	(Loeblich & Tappan, 1953)	https://www.marinespecies.org/aphia.php?p=taxdetails&id=113891
Pelosina variabilis	Brady, 1879	https://www.marinespecies.org/aphia.php?p=taxdetails&id=113894
Peneroplis pertusus	(Forsskål in Niebuhr, 1775)	https://www.marinespecies.org/aphia.php?p=taxdetails&id=112815
Pileolina patelliformis	(Brady, 1884)	https://www.marinespecies.org/aphia.php?p=taxdetails&id=466451	Discorbis patelliformis
Placopsilina bradyi	Cushman & McCulloch, 1939	https://www.marinespecies.org/aphia.php?p=taxdetails&id=112437
Placopsilinella aurantiaca	Earland, 1934	https://www.marinespecies.org/aphia.php?p=taxdetails&id=112441
Planispirillina spinigera	(Chapman, 1900)	https://www.marinespecies.org/aphia.php?p=taxdetails&id=492624	Sejuntella spirigera
Planispirinella exigua	(Brady, 1879)	https://www.marinespecies.org/aphia.php?p=taxdetails&id=112784
Planispirinoides bucculentus	(Brady, 1884)	https://www.marinespecies.org/aphia.php?p=taxdetails&id=112572	Planispirinoides bucculenta
Planoglabratella opercularis	(d'Orbigny, 1839)	https://www.marinespecies.org/aphia.php?p=taxdetails&id=466454	Neoconorbina opercularis
Planogypsina acervalis	(Brady, 1884)	https://www.marinespecies.org/aphia.php?p=taxdetails&id=113632
Planorbulina mediterranensis	d'Orbigny, 1826	https://www.marinespecies.org/aphia.php?p=taxdetails&id=113634
Planularia halophora	(Stache, 1864)	https://www.marinespecies.org/aphia.php?p=taxdetails&id=735015	Laticarinina halophora
Planularia planulata	(Galloway & Wissler, 1927)	https://www.marinespecies.org/aphia.php?p=taxdetails&id=815742	Astacolus planulatus
Planulina ariminensis	d'Orbigny, 1826	https://www.marinespecies.org/aphia.php?p=taxdetails&id=112918
Planulina bradii	Tolmachoff, 1934	https://www.marinespecies.org/aphia.php?p=taxdetails&id=816038
Planulina ecuadorana	Cushman & Stevenson, 1948	https://www.marinespecies.org/aphia.php?p=taxdetails&id=901884
Planulina limbata	Natland, 1938	https://www.marinespecies.org/aphia.php?p=taxdetails&id=521619
Planulina ornata	(d'Orbigny, 1839)	https://www.marinespecies.org/aphia.php?p=taxdetails&id=418080	Cibicides ornatus
Pleurostomella alternans	Schwager, 1866	https://www.marinespecies.org/aphia.php?p=taxdetails&id=113652
Polymorphina kincaidi	Cushman & Todd, 1947	https://www.marinespecies.org/aphia.php?p=taxdetails&id=522962
Polystomammina nitida	(Brady, 1881)	https://www.marinespecies.org/aphia.php?p=taxdetails&id=114321	Trochammina nitida
Poritextularia mexicana	Loeblich & Tappan, 1952	https://www.marinespecies.org/aphia.php?p=taxdetails&id=757534
Portatrochammina pacifica	(Cushman, 1925)	https://www.marinespecies.org/aphia.php?p=taxdetails&id=851630	Trochammina pacifica
Praeglobobulimina spinescens	(Brady, 1884)	https://www.marinespecies.org/aphia.php?p=taxdetails&id=113063	Bulimina pyrula d´Orbigny var. spinescens Brady, 1884; Globobulimina pyrula spinescens (Brady) ; Praeglobobulimina spinescens Brady
Procerolagena distoma	(Parker & Jones, 1864)	https://www.marinespecies.org/aphia.php?p=taxdetails&id=723261	Lagena distoma
Procerolagena gracilis	(Williamson, 1848)	https://www.marinespecies.org/aphia.php?p=taxdetails&id=399473	Lagena gracilis Williamson, 1846
Procerolagena meridionalis	(Wiesner, 1931)	https://www.marinespecies.org/aphia.php?p=taxdetails&id=466179	Lagena meridionalis
Procerolagena mollis	(Cushman, 1944)	https://www.marinespecies.org/aphia.php?p=taxdetails&id=417803	Lagena mollis
Procerolagena multilatera	(McCulloch, 1977)	https://www.marinespecies.org/aphia.php?p=taxdetails&id=466180
Prolixoplecta exilis	(Cushman, 1936)	https://www.marinespecies.org/aphia.php?p=taxdetails&id=757095	Dorothia exilis
Protoglobobulimina pupoides	(d'Orbigny, 1846)	https://www.marinespecies.org/aphia.php?p=taxdetails&id=526554	Bulimina pupoides; Globobulimina pupoides
Protoschista findens	(Parker, 1870)	https://www.marinespecies.org/aphia.php?p=taxdetails&id=113989
Psammatodendron arborescens	Norman in Brady, 1881	https://www.marinespecies.org/aphia.php?p=taxdetails&id=113896
Psammosiphonella discreta	(Brady, 1881)	https://www.marinespecies.org/aphia.php?p=taxdetails&id=993559	Bathysiphon discreta
Psammosphaera fusca	Schulze, 1875	https://www.marinespecies.org/aphia.php?p=taxdetails&id=114184
Psammosphaera irregularis	Folin, 1888	https://www.marinespecies.org/aphia.php?p=taxdetails&id=907358	Glomospira irregularis
Pseudobiarritzina proteiformis	(Goës, 1882)	https://www.marinespecies.org/aphia.php?p=taxdetails&id=1053005	Carpentaria proteiformis
Pseudobrizalina lobata	(Brady, 1881)	https://www.marinespecies.org/aphia.php?p=taxdetails&id=479161
Pseudobulimina chapmani	(Heron-Allen & Earland, 1922)	https://www.marinespecies.org/aphia.php?p=taxdetails&id=581993	Robertinoides chapmani (ref 3)
Pseudogaudryina atlantica	(Bailey, 1851)	https://www.marinespecies.org/aphia.php?p=taxdetails&id=417644	Gaudryina atlantica
Pseudogaudryina pacifica	(Cushman & McCulloch, 1939)	https://www.marinespecies.org/aphia.php?p=taxdetails&id=492617	Gaudryina atlantica (Bailey) var. pacifica Cushman and McCulloch
Pseudolachlanella slitella	Langer, 1992	https://www.marinespecies.org/aphia.php?p=taxdetails&id=492926
Pseudonodosaria rotundata	(Reuss, 1850)	https://www.marinespecies.org/aphia.php?p=taxdetails&id=582831	Rectoglandulina rotundata (Reuss)
Pseudonodosinella nodulosa	(Brady, 1879)	https://www.marinespecies.org/aphia.php?p=taxdetails&id=491734	Reophax nodulosus
Pseudononion granuloumbilicatum	Zheng, 1979	https://www.marinespecies.org/aphia.php?p=taxdetails&id=466472
Pseudononion japonicum	Asano, 1936	https://www.marinespecies.org/aphia.php?p=taxdetails&id=712062	Nonionella atlantica Cushman, 1947
Pseudoparrella bradyana	(Cushman, 1927)	https://www.marinespecies.org/aphia.php?p=taxdetails&id=593329	Epistominella bradyana; Pseudoparrella bradyana
Pseudoparrella californica	(White, 1956)	https://www.marinespecies.org/aphia.php?p=taxdetails&id=1351456	Epistominella californica
Pseudoparrella pacifica	(Cushman, 1927)	https://www.marinespecies.org/aphia.php?p=taxdetails&id=593332	Epistominella pacifica; Pseudoparrella pacifica
Pseudoparrella parca	Clark, 1994	https://www.marinespecies.org/aphia.php?p=taxdetails&id=556270
Pseudoparrella subperuviana	(Cushman, 1926)	https://www.marinespecies.org/aphia.php?p=taxdetails&id=761688
Pseudopolymorphina doanei	(Galloway & Wissler, 1927)	https://www.marinespecies.org/aphia.php?p=taxdetails&id=815749	Sigmomorphina doanei
Pseudopolymorphina ligua	(Roemer, 1838)	https://www.marinespecies.org/aphia.php?p=taxdetails&id=509134
Pseudosolenina wiesneri	(Barker, 1960)	https://www.marinespecies.org/aphia.php?p=taxdetails&id=709040	Fissurina wiesneri
Pseudotriloculina lecalvezae	(Kaasschieter, 1961)	https://www.marinespecies.org/aphia.php?p=taxdetails&id=759649	Triloculina laevigata d'Orbigny, 1826
Pseudotriloculina patagonica	(d'Orbigny, 1839)	https://www.marinespecies.org/aphia.php?p=taxdetails&id=492957	Quinqueloculina patagonica
Pseudotriloculina rotunda	(d'Orbigny in Schlumberger, 1893)	https://www.marinespecies.org/aphia.php?p=taxdetails&id=112578	Triloculina rotunda
Pullenia bulloides	(d'Orbigny, 1846)	https://www.marinespecies.org/aphia.php?p=taxdetails&id=113110
Pullenia catalinaensis	McCulloch, 1977	https://www.marinespecies.org/aphia.php?p=taxdetails&id=764128
Pullenia elegans	Cushman & Todd, 1943	https://www.marinespecies.org/aphia.php?p=taxdetails&id=764129
Pullenia malkinae	Coryell & Mossman, 1942	https://www.marinespecies.org/aphia.php?p=taxdetails&id=910147
Pullenia osloensis	Feyling-Hanssen, 1954	https://www.marinespecies.org/aphia.php?p=taxdetails&id=113111
Pullenia quinqueloba	(Reuss, 1851)	https://www.marinespecies.org/aphia.php?p=taxdetails&id=113112
Pullenia salisburyi	Stewart & Stewart, 1930	https://www.marinespecies.org/aphia.php?p=taxdetails&id=113113
Pullenia simplex	Rhumbler, 1931	https://www.marinespecies.org/aphia.php?p=taxdetails&id=528412
Pullenia subcarinata	(d'Orbigny, 1839)	https://www.marinespecies.org/aphia.php?p=taxdetails&id=113115	Lagenonodosaria catesbyi
Pyramidulina catesbyi	(d'Orbigny, 1839)	https://www.marinespecies.org/aphia.php?p=taxdetails&id=490018
Pyrgo bulloides	(d'Orbigny, 1826)	https://www.marinespecies.org/aphia.php?p=taxdetails&id=112584
Pyrgo denticulata	(Brady, 1884)	https://www.marinespecies.org/aphia.php?p=taxdetails&id=417694
Pyrgo depressa	(d'Orbigny, 1826)	https://www.marinespecies.org/aphia.php?p=taxdetails&id=112587
Pyrgo elongata	(d'Orbigny, 1826)	https://www.marinespecies.org/aphia.php?p=taxdetails&id=112588
Pyrgo lucernula	(Schwager, 1866)	https://www.marinespecies.org/aphia.php?p=taxdetails&id=112592
Pyrgo murrhina	(Schwager, 1866)	https://www.marinespecies.org/aphia.php?p=taxdetails&id=112593
Pyrgo nasuta	Cushman, 1935	https://www.marinespecies.org/aphia.php?p=taxdetails&id=417696
Pyrgo oblonga	(d'Orbigny, 1839)	https://www.marinespecies.org/aphia.php?p=taxdetails&id=112594
Pyrgo peruviana	(d'Orbigny, 1839)	https://www.marinespecies.org/aphia.php?p=taxdetails&id=413548
Pyrgo ringens	(Lamarck, 1804)	https://www.marinespecies.org/aphia.php?p=taxdetails&id=112597
Pyrgo rotalaria	Loeblich & Tappan, 1953	https://www.marinespecies.org/aphia.php?p=taxdetails&id=112598
Pyrgo serrata	(Bailey, 1861)	https://www.marinespecies.org/aphia.php?p=taxdetails&id=417698
Pyrgoella irregularis	(d'Orbigny, 1839)	https://www.marinespecies.org/aphia.php?p=taxdetails&id=112604	Nummoloculina irregularis, Pyrgoella irregularis
Pyrgoella sphaera	(d'Orbigny, 1839)	https://www.marinespecies.org/aphia.php?p=taxdetails&id=112605	Pyrgo subsphaerica
Pyrulina angusta	(Egger, 1857)	https://www.marinespecies.org/aphia.php?p=taxdetails&id=417899
Pyrulina cylindroides	(Roemer, 1838)	https://www.marinespecies.org/aphia.php?p=taxdetails&id=112606	Apiopterina cylindroides
Pyrulina fusiformis	(Roemer, 1838)	https://www.marinespecies.org/aphia.php?p=taxdetails&id=466332
Pyrulinoides acuminata	d'Orbigny, 1840)	https://www.marinespecies.org/aphia.php?p=taxdetails&id=926983	Pyrulinoides acuminatus
Quadrimorphina laevigata	(Phleger & Parker, 1951)	https://www.marinespecies.org/aphia.php?p=taxdetails&id=466407	Valvulineria laevigata
Quinqueloculina agglutinans	d'Orbigny, 1839	https://www.marinespecies.org/aphia.php?p=taxdetails&id=466054
Quinqueloculina akneriana	d'Orbigny, 1846	https://www.marinespecies.org/aphia.php?p=taxdetails&id=112608
Quinqueloculina angulostriata	Cushman & Valentine, 1930	https://www.marinespecies.org/aphia.php?p=taxdetails&id=522970
Quinqueloculina annectens	(Schlumberger, 1893)	https://www.marinespecies.org/aphia.php?p=taxdetails&id=112612	Massilina annectens Schlumberger, 1893
Quinqueloculina arctica	Cushman, 1933	https://www.marinespecies.org/aphia.php?p=taxdetails&id=112613
Quinqueloculina auberiana	d'Orbigny, 1839	https://www.marinespecies.org/aphia.php?p=taxdetails&id=112615
Quinqueloculina baueri	Brenner, 1962	https://www.marinespecies.org/aphia.php?p=taxdetails&id=528139
Quinqueloculina bellatula	Bandy, 1950	https://www.marinespecies.org/aphia.php?p=taxdetails&id=850265
Quinqueloculina bidentata	d'Orbigny, 1839	https://www.marinespecies.org/aphia.php?p=taxdetails&id=112619
Quinqueloculina bosciana	d'Orbigny, 1839	https://www.marinespecies.org/aphia.php?p=taxdetails&id=112620
Quinqueloculina catalinensis	Natland, 1938	https://www.marinespecies.org/aphia.php?p=taxdetails&id=417704
Quinqueloculina compta	Cushman, 1947	https://www.marinespecies.org/aphia.php?p=taxdetails&id=417706
Quinqueloculina costata	d'Orbigny in Terquem, 1878	https://www.marinespecies.org/aphia.php?p=taxdetails&id=523480
Quinqueloculina elongata	Natland, 1938	https://www.marinespecies.org/aphia.php?p=taxdetails&id=112634
Quinqueloculina flexuosa	d'Orbigny, 1839	https://www.marinespecies.org/aphia.php?p=taxdetails&id=112636
Quinqueloculina gigas	Natland, 1938	https://www.marinespecies.org/aphia.php?p=taxdetails&id=521620
Quinqueloculina granulosa	Natland, 1938	https://www.marinespecies.org/aphia.php?p=taxdetails&id=521621
Quinqueloculina gregaria	Andreae, 1884	https://www.marinespecies.org/aphia.php?p=taxdetails&id=905025
Quinqueloculina jugosa	Cushman, 1944	https://www.marinespecies.org/aphia.php?p=taxdetails&id=112641
Quinqueloculina laevigata	Didkovskiy, 1961	https://www.marinespecies.org/aphia.php?p=taxdetails&id=1430332
Quinqueloculina lamarckiana	d'Orbigny, 1839	https://www.marinespecies.org/aphia.php?p=taxdetails&id=112643
Quinqueloculina microcostata	Natland, 1938	https://www.marinespecies.org/aphia.php?p=taxdetails&id=521622
Quinqueloculina poeyana	d'Orbigny, 1839	https://www.marinespecies.org/aphia.php?p=taxdetails&id=417712
Quinqueloculina pygmaea	Reuss, 1850	https://www.marinespecies.org/aphia.php?p=taxdetails&id=112668
Quinqueloculina samoaensis	Cushman, 1924	https://www.marinespecies.org/aphia.php?p=taxdetails&id=417714
Quinqueloculina seminulum	(Linnaeus, 1758)	https://www.marinespecies.org/aphia.php?p=taxdetails&id=112675	Quinqueloculina seminuda; Quinqueloculina seminula
Quinqueloculina stalkeri	Loeblich & Tappan, 1953	https://www.marinespecies.org/aphia.php?p=taxdetails&id=112678
Quinqueloculina subcuneata	Cushman, 1921	https://www.marinespecies.org/aphia.php?p=taxdetails&id=582385	Quinqueloculina crassa d´Orbigny var. subcuneata
Quinqueloculina tenagos	Parker, 1962	https://www.marinespecies.org/aphia.php?p=taxdetails&id=417719
Quinqueloculina venusta	Karrer, 1868	https://www.marinespecies.org/aphia.php?p=taxdetails&id=112688
Quinqueloculina vulgaris	d'Orbigny, 1826	https://www.marinespecies.org/aphia.php?p=taxdetails&id=112690
Quinqueloculina weaveri	Rau, 1948	https://www.marinespecies.org/aphia.php?p=taxdetails&id=417723
Rectobolivina bifrons	(Brady, 1881)	https://www.marinespecies.org/aphia.php?p=taxdetails&id=466354
Rectobolivina hancocki	(Cushman & McCulloch, 1942)	https://www.marinespecies.org/aphia.php?p=taxdetails&id=816483	Bifarina hancocki; Rectobolivina hancocki; Rectobolivina hancocki (Cushman and McCulloch)+ Rectobolivina pacifica (Cushman and McCulloch) en ref: 36
Rectocibicides miocenicus	Cushman & Ponton, 1932	https://www.marinespecies.org/aphia.php?p=taxdetails&id=911407
Recurvoidella bradyi	(Robertson, 1891)	https://www.marinespecies.org/aphia.php?p=taxdetails&id=114324	Haplophragmoides (Recurvoidella) parkerae (Uchio, 1960), Recurvoidella bradyi, Thalmannammina cf. Parkerae (Uchio, 1960)
Recurvoides contortus	Earland, 1934	https://www.marinespecies.org/aphia.php?p=taxdetails&id=899197	Recurvoides contorta, Recurvoides laevigatus Höglund, 1947,
Recurvoides trochamminiformis	Höglund, 1947	https://www.marinespecies.org/aphia.php?p=taxdetails&id=1039525
Recurvoides turbinatus	(Brady, 1881)	https://www.marinespecies.org/aphia.php?p=taxdetails&id=114058	Cribrostomoides turbinatum
Reissia hystrix	(Brady, 1881)	https://www.marinespecies.org/aphia.php?p=taxdetails&id=761028	Ehrenbergina hystrix
Remaneica helgolandica	Rhumbler, 1938	https://www.marinespecies.org/aphia.php?p=taxdetails&id=113719
Remaneica kellettae	(Thalmann, 1932)	https://www.marinespecies.org/aphia.php?p=taxdetails&id=417608	Trochammina kelletae
Reophax agglutinatus	Cushman, 1913	https://www.marinespecies.org/aphia.php?p=taxdetails&id=183387
Reophax bilocularis	Lipnik, 1978	https://www.marinespecies.org/aphia.php?p=taxdetails&id=1336887
Reophax communis	Lacroix, 1930	https://www.marinespecies.org/aphia.php?p=taxdetails&id=520977
Reophax curtus	Cushman, 1920	https://www.marinespecies.org/aphia.php?p=taxdetails&id=113997
Reophax ellisi	Brenner, 1962	https://www.marinespecies.org/aphia.php?p=taxdetails&id=528140
Reophax excentricus	Cushman, 1910	https://www.marinespecies.org/aphia.php?p=taxdetails&id=710228
Reophax fusiformis	(Williamson, 1858)	https://www.marinespecies.org/aphia.php?p=taxdetails&id=114003
Reophax helenae	Rhumbler, 1931	https://www.marinespecies.org/aphia.php?p=taxdetails&id=114006
Reophax horrida	Cushman, 1912	https://www.marinespecies.org/aphia.php?p=taxdetails&id=710229	Reophax horridus
Reophax longicollis	(Wiesner, 1931)	https://www.marinespecies.org/aphia.php?p=taxdetails&id=114007
Reophax longiscatiformis	Chapman, 1916	https://www.marinespecies.org/aphia.php?p=taxdetails&id=909680	Lagenammina longicollis,Proteonina longicollis, Saccammina longicollis
Reophax margaritarius	Rhumbler, 1931	https://www.marinespecies.org/aphia.php?p=taxdetails&id=528413
Reophax micaceus	Earland, 1934	https://www.marinespecies.org/aphia.php?p=taxdetails&id=114009
Reophax nana	Rhumbler, 1913	https://www.marinespecies.org/aphia.php?p=taxdetails&id=114011	Reophax nanus
Reophax pilulifer	Brady, 1884	https://www.marinespecies.org/aphia.php?p=taxdetails&id=1039012	Hormosina pilulifera
Reophax regularis	Höglund, 1947	https://www.marinespecies.org/aphia.php?p=taxdetails&id=114014
Reophax scorpiurus	Montfort, 1808	https://www.marinespecies.org/aphia.php?p=taxdetails&id=114016
Reophax spiculifer	Brady, 1879	https://www.marinespecies.org/aphia.php?p=taxdetails&id=417570
Reophax spiculotestus	Cushman, 1910	https://www.marinespecies.org/aphia.php?p=taxdetails&id=710230
Reophax subdentaliniformis	Parr, 1950	https://www.marinespecies.org/aphia.php?p=taxdetails&id=397222
Reophax subfusiformis	Earland Em. Höglund, 1947	https://www.marinespecies.org/aphia.php?p=taxdetails&id=921403
Resigella moniliformis	(Resig, 1982)	https://www.marinespecies.org/aphia.php?p=taxdetails&id=746097
Reussella aequa	Cushman & McCulloch, 1948	https://www.marinespecies.org/aphia.php?p=taxdetails&id=490048
Reussella pacifica	Cushman & McCulloch, 1948	https://www.marinespecies.org/aphia.php?p=taxdetails&id=522937
Reussoolina apiculata	(Reuss, 1851)	https://www.marinespecies.org/aphia.php?p=taxdetails&id=760034	Oolina apiculata
Reussoolina laevis	(Montagu, 1803)	https://www.marinespecies.org/aphia.php?p=taxdetails&id=509125	Lagena laevis
Rhabdammina abyssorum	Sars in Carpenter, 1869	https://www.marinespecies.org/aphia.php?p=taxdetails&id=113898
Rhabdammina linearis	Brady, 1879	https://www.marinespecies.org/aphia.php?p=taxdetails&id=113902	Oculosiphon linearis
Rhabdamminella cylindrica	(Brady, 1882)	https://www.marinespecies.org/aphia.php?p=taxdetails&id=113897	Marsipella cylindrica
Rhizammina algaeformis	Brady, 1879	https://www.marinespecies.org/aphia.php?p=taxdetails&id=113906
Rhumblerella humboldti	(Todd & Brönniman, 1957)	https://www.marinespecies.org/aphia.php?p=taxdetails&id=478973	Eggerella humboldti
Robertina arctica	d'Orbigny, 1846	https://www.marinespecies.org/aphia.php?p=taxdetails&id=113687
Robertina subcylindrica	(Brady, 1881)	https://www.marinespecies.org/aphia.php?p=taxdetails&id=146268
Robertinoides charlottensis	(Cushman, 1925)	https://www.marinespecies.org/aphia.php?p=taxdetails&id=113692	Ceratobulimina arctica; Metapolymorphina charlottensis; Robertina charlottensis; Robertionides charlottensis
Robertinoides oceanica	(Cushman & Parker, 1947)	https://www.marinespecies.org/aphia.php?p=taxdetails&id=418119	Robertina oceanica; Robertinoides oceanicus
Rosalina columbiensis	(Cushman, 1925)	https://www.marinespecies.org/aphia.php?p=taxdetails&id=418031	Rotalia columbiensis
Rosalina consobrina	d'Orbigny, 1839	https://www.marinespecies.org/aphia.php?p=taxdetails&id=899113	Discorbis consobrinus
Rosalina cora	d'Orbigny, 1839	https://www.marinespecies.org/aphia.php?p=taxdetails&id=899309
Rosalina floridana	(Cushman, 1922)	https://www.marinespecies.org/aphia.php?p=taxdetails&id=113169
Rosalina floridensis	(Cushman, 1930)	https://www.marinespecies.org/aphia.php?p=taxdetails&id=113170	Discorbis floridana; Discorbis floridanus
Rosalina globularis	d'Orbigny, 1826	https://www.marinespecies.org/aphia.php?p=taxdetails&id=113171
Rosalina lomaensis	(Bandy, 1953)	https://www.marinespecies.org/aphia.php?p=taxdetails&id=582674	Rotorbinella lomaensis
Rosalina obtusa	d'Orbigny, 1846	https://www.marinespecies.org/aphia.php?p=taxdetails&id=418032	Discorbis obtusus
Rotalia versiformis	Bandy, 1953	https://www.marinespecies.org/aphia.php?p=taxdetails&id=848917	Rotorbinella versiformis
Rotaliammina squamiformis	(Cushman & McCulloch, 1939)	https://www.marinespecies.org/aphia.php?p=taxdetails&id=417615	Trochammina squamiformis
Rotorbinella campanulata	(Galloway & Wissler, 1927)	https://www.marinespecies.org/aphia.php?p=taxdetails&id=763919	Gavelinopsis campanulata ; RosaIina campanulata; Discorbis campanulata
Rotorbinella magdalensis	(Lankford, 1973)	https://www.marinespecies.org/aphia.php?p=taxdetails&id=1389893	Pararotalia magdalenensis
Rotorbinella rosea	(d'Orbigny in Guérin-Méneville, 1832)	https://www.marinespecies.org/aphia.php?p=taxdetails&id=557021	Discorbis rosea; Rotalia rosea
Rotorbinella turbinata	(Cushman & Valentine, 1930)	https://www.marinespecies.org/aphia.php?p=taxdetails&id=1323040	Gavelinopsis turbinata
Rupertina stabilis	(Wallich, 1877)	https://www.marinespecies.org/aphia.php?p=taxdetails&id=113481
Rutherfordoides mexicanus	(Cushman, 1922)	https://www.marinespecies.org/aphia.php?p=taxdetails&id=1540274	Ruthefordoides mexicana; Virgulina mexicana
Rutherfordoides rotundatus	(Parr, 1950)	https://www.marinespecies.org/aphia.php?p=taxdetails&id=1540267	Fursenkoina rotunda (spelling mistake in Heinz et al., 2008?); Rutherfordoides rotundata; Virgulinella rotundata; Fursenkoina rotundata
Saccammina edita	(Saidova, 1975)	https://www.marinespecies.org/aphia.php?p=taxdetails&id=491728	Thurammina edita
Saccammina grzybowskii	(Schubert, 1902)	https://www.marinespecies.org/aphia.php?p=taxdetails&id=1036555	Proteonina grzybowskii
Saccammina socialis	Brady, 1884	https://www.marinespecies.org/aphia.php?p=taxdetails&id=417561
Saccammina sphaerica	Brady, 1871	https://www.marinespecies.org/aphia.php?p=taxdetails&id=114191
Saccorhiza ramosa	(Brady, 1879)	https://www.marinespecies.org/aphia.php?p=taxdetails&id=113974
Sahulia conica	(d'Orbigny, 1839)	https://www.marinespecies.org/aphia.php?p=taxdetails&id=114253	Textularia conica
Sahulia kerimbaensis	(Said, 1949)	https://www.marinespecies.org/aphia.php?p=taxdetails&id=489117	Textularia corrugata Heron-Allen and Earland 1915
Saracenaria angularis	Natland, 1938	https://www.marinespecies.org/aphia.php?p=taxdetails&id=508061
Saracenaria latifrons	(Brady, 1884)	https://www.marinespecies.org/aphia.php?p=taxdetails&id=417855
Seabrookia pellucida	Brady, 1890	https://www.marinespecies.org/aphia.php?p=taxdetails&id=466320	Seabrockia earlandii
Seabrookia rugosa	Watanabe, 1989	https://www.marinespecies.org/aphia.php?p=taxdetails&id=556457
Serpula lobata	Montagu, 1803	https://www.marinespecies.org/aphia.php?p=taxdetails&id=331853	Cibicides lobatus (Montagu)
Sestronophora arnoldi	Loeblich & Tappan, 1957	https://www.marinespecies.org/aphia.php?p=taxdetails&id=526995
Sigmoihauerina bradyi	(Cushman, 1917)	https://www.marinespecies.org/aphia.php?p=taxdetails&id=112525	Hauerina bradyi
Sigmoilina distorta	Phleger & Parker, 1951	https://www.marinespecies.org/aphia.php?p=taxdetails&id=112694
Sigmoilopsis elliptica	(Galloway & Wissler, 1927)	https://www.marinespecies.org/aphia.php?p=taxdetails&id=466073	Sigmoilina elliptica; Sigmoilopsis elliptica
Sigmoilopsis schlumbergeri	(Silvestri, 1904)	https://www.marinespecies.org/aphia.php?p=taxdetails&id=112704
Sigmomorphina frondiculariformis	(Galloway & Wissler, 1927)	https://www.marinespecies.org/foraminifera/aphia.php?p=taxdetails&id=1499963
Sigmomorphina gallowayi	Cushman & Ozawa, 1930	https://www.marinespecies.org/aphia.php?p=taxdetails&id=815368
Sigmomorphina torta	(Galloway & Wissler, 1927)	https://www.marinespecies.org/aphia.php?p=taxdetails&id=1499966
Sigmomorphina trilocularis	(Bagg, 1912)	https://www.marinespecies.org/aphia.php?p=taxdetails&id=815802
Sigmopyrgo vespertilio	(Sclumberger, 1891)	https://www.marinespecies.org/aphia.php?p=taxdetails&id=531980	Pyrgo vespertilio
Siphogenerina dimorpha	(Parker & Jones, 1865)	https://www.marinespecies.org/aphia.php?p=taxdetails&id=417938	Sagrina dimorpha
Siphogenerina raphanus	(Parker & Jones, 1865)	https://www.marinespecies.org/aphia.php?p=taxdetails&id=417939
Siphonaperta agglutinata	(Cushman, 1917)	https://www.marinespecies.org/aphia.php?p=taxdetails&id=741093	Quinqueloculina agglutinata
Siphonaperta sabulosa	(Cushman, 1947)	https://www.marinespecies.org/aphia.php?p=taxdetails&id=417730	Quinqueloculina sabulosa
Siphotextularia rolshauseni	Phleger & Parker, 1951	https://www.marinespecies.org/aphia.php?p=taxdetails&id=114261
Siphouvigerina ampullacea	(Brady, 1884)	https://www.marinespecies.org/aphia.php?p=taxdetails&id=580066	Uvigerina ampullacea
Siphouvigerina hispida	(Schwager, 1866)	https://www.marinespecies.org/aphia.php?p=taxdetails&id=580067	Uvigerina hispida
Siphouvigerina proboscidea	(Schwager, 1866)	https://www.marinespecies.org/aphia.php?p=taxdetails&id=580069	Uvigerina proboscidea Schwager var. vadescens Cushman, 1933; Uvigerina proboscidea
Siphouvigerina pseudoampullacea	(Asano, 1938)	https://www.marinespecies.org/aphia.php?p=taxdetails&id=850067
Sorosphaera confusa	Brady, 1879	https://www.marinespecies.org/aphia.php?p=taxdetails&id=114194
Sphaerogypsina globulus	(Reuss, 1848)	https://www.marinespecies.org/aphia.php?p=taxdetails&id=417984	Gypsina globulus
Sphaeroidina bulloides	d'Orbigny in Deshayes, 1828	https://www.marinespecies.org/aphia.php?p=taxdetails&id=992022
Spirillina vivipara	Ehrenberg, 1843	https://www.marinespecies.org/aphia.php?p=taxdetails&id=113737
Spiroglutina asperula	(Karrer, 1868)	https://www.marinespecies.org/aphia.php?p=taxdetails&id=594407
Spirolocammina tenuis	Antropov, 1950	https://www.marinespecies.org/aphia.php?p=taxdetails&id=922464
Spiroloculina antillarum	d'Orbigny, 1839	https://www.marinespecies.org/aphia.php?p=taxdetails&id=417752
Spiroloculina communis	Cushman & Todd, 1944	https://www.marinespecies.org/aphia.php?p=taxdetails&id=112720
Spiroloculina dentata	Cushman & Todd, 1944	https://www.marinespecies.org/aphia.php?p=taxdetails&id=417755
Spiroloculina depressa	d'Orbigny, 1826	https://www.marinespecies.org/aphia.php?p=taxdetails&id=112722
Spiroloculina fragilis	Uchio, 1960	https://www.marinespecies.org/aphia.php?p=taxdetails&id=492882
Spiroloculina planulata	(Lamarck, 1804)	https://www.marinespecies.org/aphia.php?p=taxdetails&id=112737
Spiroloculina robusta	Brady, 1884	https://www.marinespecies.org/aphia.php?p=taxdetails&id=480166
Spiroloculina soldanii	Fornasini, 1886	https://www.marinespecies.org/aphia.php?p=taxdetails&id=417759
Spiroloculina venusta	Cushman & Todd, 1944	https://www.marinespecies.org/aphia.php?p=taxdetails&id=480168
Spirophthalmidium acutimargo	(Brady, 1884)	https://www.marinespecies.org/aphia.php?p=taxdetails&id=112788	Ophthalmidium acutimargo
Spiroplectammina bathyca	Uchio, 1960	https://www.marinespecies.org/aphia.php?p=taxdetails&id=522146
Spiroplectammina biformis	(Parker & Jones, 1865)	https://www.marinespecies.org/aphia.php?p=taxdetails&id=114226
Spiroplectammina filiformis	Earland, 1934	https://www.marinespecies.org/aphia.php?p=taxdetails&id=903173
Spirosigmoilina pusilla	(Earland, 1934)	https://www.marinespecies.org/aphia.php?p=taxdetails&id=112791	Ophtalmidium pusillum; Spiroloculina pusilla Earland
Spirosigmoilina tenuis	(Cžjžek, 1848)	https://www.marinespecies.org/aphia.php?p=taxdetails&id=466078	Sigmoilina tenuis ; Spiroloculina tenuis
Stainforthia concava	(Höglund, 1947)	https://www.marinespecies.org/aphia.php?p=taxdetails&id=113069
Stainforthia feylingi	Knudsen & Seidenkrantz, 1994	https://www.marinespecies.org/aphia.php?p=taxdetails&id=556320
Stainforthia fusiformis	(Williamson, 1858)	https://www.marinespecies.org/aphia.php?p=taxdetails&id=113070	Fursenkoina fusiformis
Stomatorbina concentrica	(Parker & Jones, 1864)	https://www.marinespecies.org/aphia.php?p=taxdetails&id=113510	Mississipina concentrica
Subreophax aduncus	(Brady, 1882)	https://www.marinespecies.org/aphia.php?p=taxdetails&id=114022	Hormosina aduncus, Subreophax aduncus
Suggrunda eckisi	Natland, 1950	https://www.marinespecies.org/aphia.php?p=taxdetails&id=521635
Suggrunda kleinpelli	Bramlette, 1951	https://www.marinespecies.org/aphia.php?p=taxdetails&id=908188
Suggrunda porosa	Hoffmeister & Berry, 1937	https://www.marinespecies.org/aphia.php?p=taxdetails&id=417973
Takayanagia cushmani	(Stewart & Stewart, 1930)	https://www.marinespecies.org/aphia.php?p=taxdetails&id=1551111
Takayanagia delicata	(Cushman, 1927)	https://www.marinespecies.org/aphia.php?p=taxdetails&id=526531	Cassidulina delicata
Technitella harrisii	(Heron-Allen & Earland, 1914)	https://www.marinespecies.org/aphia.php?p=taxdetails&id=465951	Nouria harrisii
Textularia agglutinans	Seguenza, 1862	https://www.marinespecies.org/aphia.php?p=taxdetails&id=894766
Textularia calva	Lalicker, 1935	https://www.marinespecies.org/aphia.php?p=taxdetails&id=114269
Textularia candeiana	d'Orbigny, 1839	https://www.marinespecies.org/aphia.php?p=taxdetails&id=417660
Textularia conica	Zalesny, 1959	https://www.marinespecies.org/Foraminifera/aphia.php?p=taxdetails&id=928052
Textularia cuyleri	Davis, 1941	https://www.marinespecies.org/aphia.php?p=taxdetails&id=900316
Textularia earlandi	Parker, 1952	https://www.marinespecies.org/aphia.php?p=taxdetails&id=114273	Textularia tenuissima Earland, 1933, Spiroplectammina earlandi
Textularia foliacea	Heron-Allen & Earland, 1915	https://www.marinespecies.org/aphia.php?p=taxdetails&id=489119
Textularia gramen	d'Orbigny, 1846	https://www.marinespecies.org/aphia.php?p=taxdetails&id=114277	Textularia abbreviata
Textularia mariae	d'Orbigny, 1846	https://www.marinespecies.org/aphia.php?p=taxdetails&id=737215	Textularia articulata d 'Orbigny, 1846
Textularia oceanica	Cushman, 1932	https://www.marinespecies.org/aphia.php?p=taxdetails&id=491929	Textularia foliacea var. oceanica
Textularia panamensis	Cushman, 1918	https://www.marinespecies.org/aphia.php?p=taxdetails&id=114280
Textularia porrecta	Brady, 1884	https://www.marinespecies.org/aphia.php?p=taxdetails&id=114281
Textularia pseudogramen	Chapman & Parr, 1937	https://www.marinespecies.org/aphia.php?p=taxdetails&id=114282
Textularia sandiegoensis	Uchio, 1960	https://www.marinespecies.org/aphia.php?p=taxdetails&id=522147
Textularia schencki	Cushman & Valentine, 1930	https://www.marinespecies.org/aphia.php?p=taxdetails&id=522972
Textularia secasensis	Lalicker & McCulloch, 1940	https://www.marinespecies.org/aphia.php?p=taxdetails&id=417666
Textularia torquata	Parker, 1952	https://www.marinespecies.org/aphia.php?p=taxdetails&id=114288
Textularia vola	Lalicker & McCulloch, 1940	https://www.marinespecies.org/aphia.php?p=taxdetails&id=520994
Textularia wiesneri	Earland, 1933	https://www.marinespecies.org/aphia.php?p=taxdetails&id=925071
Tholosina bull	(Brady, 1881)	https://www.marinespecies.org/aphia.php?p=taxdetails&id=114203
Tholosina confusa	(Cushman, 1920)	https://www.marinespecies.org/aphia.php?p=taxdetails&id=114206	Placopsilina confusa
Thurammina albicans	Brady, 1879	https://www.marinespecies.org/aphia.php?p=taxdetails&id=114211
Thurammina irregularis	Wiesner, 1931	https://www.marinespecies.org/aphia.php?p=taxdetails&id=522202
Thurammina papillata	Brady, 1879	https://www.marinespecies.org/aphia.php?p=taxdetails&id=114215
Tidwellella exorna	(Phleger & Parker, 1951)	https://www.marinespecies.org/aphia.php?p=taxdetails&id=1054044	Planulina exorna
Tinogullmia hyalina	Nyholm, 1954	https://www.marinespecies.org/aphia.php?p=taxdetails&id=112478
Tinogullmia riemanni	Gooday, 1990	https://www.marinespecies.org/aphia.php?p=taxdetails&id=112479
Tolypammina vagans	(Brady, 1879)	https://www.marinespecies.org/aphia.php?p=taxdetails&id=113834
Tortoplectella rhomboidalis	(Millett, 1899)	https://www.marinespecies.org/aphia.php?p=taxdetails&id=526518	Bolivina rhomboidalis
Tosaia hanzawai	Takayanagi, 1953	https://www.marinespecies.org/aphia.php?p=taxdetails&id=600592
Tretomphalus bulloides	(d'Orbigny, 1839)	https://www.marinespecies.org/aphia.php?p=taxdetails&id=113184
Trifarina agrestis	(Todd, 1948)	https://www.marinespecies.org/aphia.php?p=taxdetails&id=580053	Angulogerina agrestis
Trifarina angulosa	(Williamson, 1858)	https://www.marinespecies.org/aphia.php?p=taxdetails&id=113756	Angulogerina angulosa (Williamson); Angulogerina angulosa Chapman and Parr, 1937; Angulogerina carinata Cushman 1927 Angulogerina carinata Cushman, 1927; Trifarina carinata (Cushman, 1923)
Trifarina bella	(Phleger & Parker, 1951)	https://www.marinespecies.org/aphia.php?p=taxdetails&id=417943	Angulogerina bella
Trifarina bradyi	Cushman, 1923	https://www.marinespecies.org/aphia.php?p=taxdetails&id=113757
Trifarina fluens	(Todd in Cushman & McCulloch, 1948)	https://www.marinespecies.org/aphia.php?p=taxdetails&id=113759	Angulogerina hughesi
Trifarina hughesi	(Galloway & Wissler, 1927)	https://www.marinespecies.org/aphia.php?p=taxdetails&id=580060
Trifarina jamaicensis	(Cushman & Todd, 1945)	https://www.marinespecies.org/aphia.php?p=taxdetails&id=417944	Angulogerinajamaicensis
Trifarina occidentalis	(Cushman, 1923)	https://www.marinespecies.org/aphia.php?p=taxdetails&id=417945	Angulogerina occidentalis
Trifarina reussii	(Cushman, 1913)	https://www.marinespecies.org/aphia.php?p=taxdetails&id=480303
Trifarina semitrigona	(Galloway & Wissler, 1927)	https://www.marinespecies.org/aphia.php?p=taxdetails&id=852177	Angulogerina semitrigona
Triloculina funafutiensis	(Chapman, 1901)	https://www.marinespecies.org/aphia.php?p=taxdetails&id=559857	Quinqueloculina funafutiensis
Triloculina gibba	d'Orbigny, 1826	https://www.marinespecies.org/aphia.php?p=taxdetails&id=112755	Triloculina inornata d‘Orbigny
Triloculina inflata	d'Orbigny, 1826	https://www.marinespecies.org/aphia.php?p=taxdetails&id=112758
Triloculina oblonga	(Montagu, 1803)	https://www.marinespecies.org/aphia.php?p=taxdetails&id=112764	Miliolinella oblonga
Triloculina schreiberiana	d'Orbigny, 1839	https://www.marinespecies.org/aphia.php?p=taxdetails&id=112769
Triloculina tricarinata	d'Orbigny in Deshayes, 1832	https://www.marinespecies.org/aphia.php?p=taxdetails&id=991800
Triloculina trigonula	(Lamarck, 1804)	https://www.marinespecies.org/aphia.php?p=taxdetails&id=112772
Triloculina trihedra	Loeblich & Tappan, 1953	https://www.marinespecies.org/aphia.php?p=taxdetails&id=163643
Tritaxilina caperata	(Brady, 1881)	https://www.marinespecies.org/aphia.php?p=taxdetails&id=480206	Tritaxilina atlantica Cushman, 1922
Tritaxis challengeri	(Hedley, Hurdle & Burdett, 1964)	https://www.marinespecies.org/aphia.php?p=taxdetails&id=114332
Tritaxis conica	(Parker & Jones, 1865)	https://www.marinespecies.org/aphia.php?p=taxdetails&id=114333
Tritaxis fusca	(Williamson, 1858)	https://www.marinespecies.org/aphia.php?p=taxdetails&id=114334
Trochammina abyssorum	Saidova, 1961	https://www.marinespecies.org/aphia.php?p=taxdetails&id=521769
Trochammina advena	Cushman, 1922	https://www.marinespecies.org/aphia.php?p=taxdetails&id=114337
Trochammina conica	Luperto, 1966	https://www.marinespecies.org/aphia.php?p=taxdetails&id=899061
Trochammina discorbinoides	Uchio, 1960	https://www.marinespecies.org/aphia.php?p=taxdetails&id=522149
Trochammina inflata	(Montagu, 1808)	https://www.marinespecies.org/aphia.php?p=taxdetails&id=114348
Trochammina intermedia	Rhumbler, 1938	https://www.marinespecies.org/aphia.php?p=taxdetails&id=114349
Trochammina labiata	Uchio, 1960	https://www.marinespecies.org/aphia.php?p=taxdetails&id=522150
Trochammina malovensis	Heron-Allen & Earland, 1929	https://www.marinespecies.org/aphia.php?p=taxdetails&id=523123
Trochammina nana	(Brady, 1881)	https://www.marinespecies.org/aphia.php?p=taxdetails&id=466011
Trochammina peirsonae	Uchio, 1963	https://www.marinespecies.org/aphia.php?p=taxdetails&id=528486
Trochammina rhumbleri	Uchio, 1960	https://www.marinespecies.org/aphia.php?p=taxdetails&id=522151
Trochammina squamata	Jones & Parker, 1860	https://www.marinespecies.org/aphia.php?p=taxdetails&id=114360	Tritaxis squamata
Trochammina subconica	Tairov, 1959	https://www.marinespecies.org/aphia.php?p=taxdetails&id=1036346
Trochammina subglabra	Saidova, 1961	https://www.marinespecies.org/aphia.php?p=taxdetails&id=417621
Trochammina vesicularis	Goës, 1894	https://www.marinespecies.org/aphia.php?p=taxdetails&id=523023
Trochamminoides proteus	(Karrer, 1866) emend. Rögl, 1995	https://www.marinespecies.org/aphia.php?p=taxdetails&id=417599	Trochamminoides protea
Trochamminopsis parvus	Brönnimann & Whittaker, 1988	https://www.marinespecies.org/aphia.php?p=taxdetails&id=398898
Tubinella funalis	(Brady, 1884)	https://www.marinespecies.org/aphia.php?p=taxdetails&id=417765
Uvigerina aculeata	d'Orbigny, 1846	https://www.marinespecies.org/aphia.php?p=taxdetails&id=580071
Uvigerina asperula	Cžjžek, 1848	https://www.marinespecies.org/aphia.php?p=taxdetails&id=525673
Uvigerina auberiana	d'Orbigny, 1839	https://www.marinespecies.org/aphia.php?p=taxdetails&id=113763
Uvigerina baggi	Galloway & Wissler, 1927	https://www.marinespecies.org/aphia.php?p=taxdetails&id=896254	Angulogerina baggi
Uvigerina bellula	Bandy, 1956	https://www.marinespecies.org/foraminifera/aphia.php?p=taxdetails&id=417946	Uvigerina auberiana d´Orbigny var. laevis Goës 1896
Uvigerina bifurcata	d'Orbigny, 1839	https://www.marinespecies.org/aphia.php?p=taxdetails&id=113764
Uvigerina bradyana	Fornasini, 1900	https://www.marinespecies.org/aphia.php?p=taxdetails&id=526564
Uvigerina brunnensis	Karrer, 1877	https://www.marinespecies.org/aphia.php?p=taxdetails&id=710259
Uvigerina canariensis	d'Orbigny, 1839	https://www.marinespecies.org/aphia.php?p=taxdetails&id=113766
Uvigerina crassicostata	Schwager, 1866	https://www.marinespecies.org/aphia.php?p=taxdetails&id=899664
Uvigerina curticosta	(Cushman, 1927)	https://www.marinespecies.org/aphia.php?p=taxdetails&id=523553
Uvigerina cushmani	Todd, 1948	https://www.marinespecies.org/aphia.php?p=taxdetails&id=528461
Uvigerina dirupta	Todd, 1948	https://www.marinespecies.org/aphia.php?p=taxdetails&id=526565	Uvigerina peregrina Cushman var. dirupta Todd, 1948
Uvigerina excellens	Todd, 1948	https://www.marinespecies.org/aphia.php?p=taxdetails&id=528462
Uvigerina hispidocostata	Cushman & Todd, 1945	https://www.marinespecies.org/aphia.php?p=taxdetails&id=417948
Uvigerina hollicki	Thalmann, 1950	https://www.marinespecies.org/aphia.php?p=taxdetails&id=113771
Uvigerina hootsi	Rankin, 1934	https://www.marinespecies.org/aphia.php?p=taxdetails&id=815383
Uvigerina incilis	Todd, 1948	https://www.marinespecies.org/aphia.php?p=taxdetails&id=528463
Uvigerina juncea	Cushman & Todd, 1941	https://www.marinespecies.org/aphia.php?p=taxdetails&id=862721	Euuvigerina juncea
Uvigerina peregrina	Cushman, 1923	https://www.marinespecies.org/aphia.php?p=taxdetails&id=113773
Uvigerina semiornata	d'Orbigny, 1846	https://www.marinespecies.org/aphia.php?p=taxdetails&id=710511
Uvigerina senticosa	Cushman, 1927	https://www.marinespecies.org/aphia.php?p=taxdetails&id=417951
Uvigerina spinulosa	Hadley, 1934	https://www.marinespecies.org/aphia.php?p=taxdetails&id=1472161
Uvigerina striata	d'Orbigny, 1839	https://www.marinespecies.org/aphia.php?p=taxdetails&id=710260
Uvigerina striata var. attenuata	Coryell & Mossman, 1942	https://www.marinespecies.org/foraminifera/aphia.php?p=taxdetails&id=931135	Uvigerina attenuata
Uvigerina tenuistriata	Reuss, 1870	https://www.marinespecies.org/aphia.php?p=taxdetails&id=922512
Uvigerinella californica	(Cushman, 1926)	https://www.marinespecies.org/aphia.php?p=taxdetails&id=525675
Vaginulina americana	Cushman, 1923	https://www.marinespecies.org/aphia.php?p=taxdetails&id=183478
Vaginulina trilobata	(d'Orbigny, 1840)	https://www.marinespecies.org/aphia.php?p=taxdetails&id=1526710	Vaginulina aff. Trilobata
Vaginulinopsis reniformis	(d'Orbigny, 1846)	https://www.marinespecies.org/aphia.php?p=taxdetails&id=417859	Lenticulina reniformis
Vaginulinopsis sublegumen	Parr, 1950	https://www.marinespecies.org/aphia.php?p=taxdetails&id=417861
Vaginulinopsis tasmanica	Parr, 1950	https://www.marinespecies.org/aphia.php?p=taxdetails&id=466187	Astalocus tasmanica
Valvulina oblonga	d'Orbigny, 1839	https://www.marinespecies.org/aphia.php?p=taxdetails&id=912995	Valvulineria oblonga (d'Orbigny)
Valvulineria araucana	(d'Orbigny, 1839)	https://www.marinespecies.org/aphia.php?p=taxdetails&id=112958
Valvulineria bradyana	(Fornasini, 1900)	https://www.marinespecies.org/aphia.php?p=taxdetails&id=112960
Valvulineria candeiana	(d'Orbigny, 1839)	https://www.marinespecies.org/aphia.php?p=taxdetails&id=557005	Discorbis candeianus
Valvulineria glabra	Cushman, 1927	https://www.marinespecies.org/aphia.php?p=taxdetails&id=418014
Valvulineria inaequalis	(d'Orbigny, 1839)	https://www.marinespecies.org/aphia.php?p=taxdetails&id=932742	Cancris inaequalis
Valvulineria inflata	Saakyan-Gezalyan, 1957	https://www.marinespecies.org/aphia.php?p=taxdetails&id=1246605	Cancris inflata, Cancris inflatus, Cibicorbis inflatus (Cushman) see plate illustrating this species in Uchimura et al., 2017
Valvulineria mexicana	Parker, 1954	https://www.marinespecies.org/aphia.php?p=taxdetails&id=418015
Valvulineria minuta	Parker, 1954	https://www.marinespecies.org/aphia.php?p=taxdetails&id=911325
Valvulineria olssoni	Redmond, 1953	https://www.marinespecies.org/aphia.php?p=taxdetails&id=913308
Valvulineria rugosa	(d'Orbigny, 1839)	https://www.marinespecies.org/aphia.php?p=taxdetails&id=595376
Valvulineria scintillans	Coryell & Mossman, 1942	https://www.marinespecies.org/aphia.php?p=taxdetails&id=919262
Vanhoeffenella dilatata	Voltski, Gooday & Pawlowski, 2018	https://www.marinespecies.org/aphia.php?p=taxdetails&id=1358563
Vanhoeffenella oculus	Earland, 1933	https://www.marinespecies.org/aphia.php?p=taxdetails&id=913189
Vasicostella inflatiperforata	(McCulloch, 1977)	https://www.marinespecies.org/aphia.php?p=taxdetails&id=490025	Lagenosolenia inflatiperforata
Veleroninoides scitulus	(Brady, 1881)	https://www.marinespecies.org/aphia.php?p=taxdetails&id=417583	Alveolopbragmium scitulum, Cribostomoides scitulus, Recurvoides scitulum, Veleroninoides scitula, Labrospira scitula
Veleroninoides veleronis	(Cushman & McCulloch, 1939)	https://www.marinespecies.org/aphia.php?p=taxdetails&id=757058	Cribrostomoides veleranis
Verneuilinulla propinqua	(Brady, 1884)	https://www.marinespecies.org/aphia.php?p=taxdetails&id=417631	Eggerella propinqua
Verneuilinulla scrippsi	(Uchio, 1960)	https://www.marinespecies.org/aphia.php?p=taxdetails&id=849661	Eggerella scrippsi
Vertebralina striata	d'Orbigny, 1826	https://www.marinespecies.org/aphia.php?p=taxdetails&id=112785
Virgulina nodosa	Stewart & Stewart, 1930	https://www.marinespecies.org/aphia.php?p=taxdetails&id=912585
Virgulinella fragilis	Grindell & Collen, 1976	https://www.marinespecies.org/aphia.php?p=taxdetails&id=466393
Virgulopsis spinea	(Cushman, 1936)	https://www.marinespecies.org/aphia.php?p=taxdetails&id=533662	Bolivina spinea
